# Supplementary material for: Synthesis of 3-halochromones with simple KX halogen sources enabled by in situ halide oxidation
Source: Royal Society of Chemistry journal article supplement (doi:10.1039/d0nj00825g), 2020-01-01
Supplement: d0nj00825g1.pdf [file d0nj00825g1.pdf]

## Synthesis of 3-halochromones with simple KX halogen sources enabled by in situ halide oxidation

Yan Lin,<sup>a</sup> Jie-Ping Wan and Yunyun Liu<sup>\*,a</sup>

<sup>a</sup>College of Chemistry and Chemical Engineering, Jiangxi Normal University,  
Nanchang 330022, P. R. China

**Email:** chemliuyunyun@jxnu.edu.cn

### General experimental information

Enaminones **1** were prepared following known procedure.<sup>1</sup> All other reagents were obtained from commercial sources and used directly without further purification. The organic solvents were treated following standard procedures before use. All reactions were performed in 25 mL round bottom flask. Silica gel plate GF254 was used for thin layer chromatography (TLC) by visualizing with ultraviolet light. Nuclear magnetic resonance (NMR) spectra are recorded in a 400 MHz apparatus in CDCl<sub>3</sub> or DMSO-*d*<sub>6</sub> with TMS internal standard. The frequencies for <sup>1</sup>H and <sup>13</sup>C NMR test were 400 MHz and 100 MHz, respectively. The chemical shifts were reported in parts per million with reference to the TMS internal standard. HMRS data for new compounds were acquired in the mass spectrometer equipped with TOF analyzer. Melting points were tested in an X-4A apparatus without correcting temperature.

### Reference

1. Y. Gao, Y. Liu and J.-P. Wan, *J. Org. Chem.*, 2019, **84**, 2243-2251.

<sup>1</sup>H and <sup>13</sup>C NMR of all products

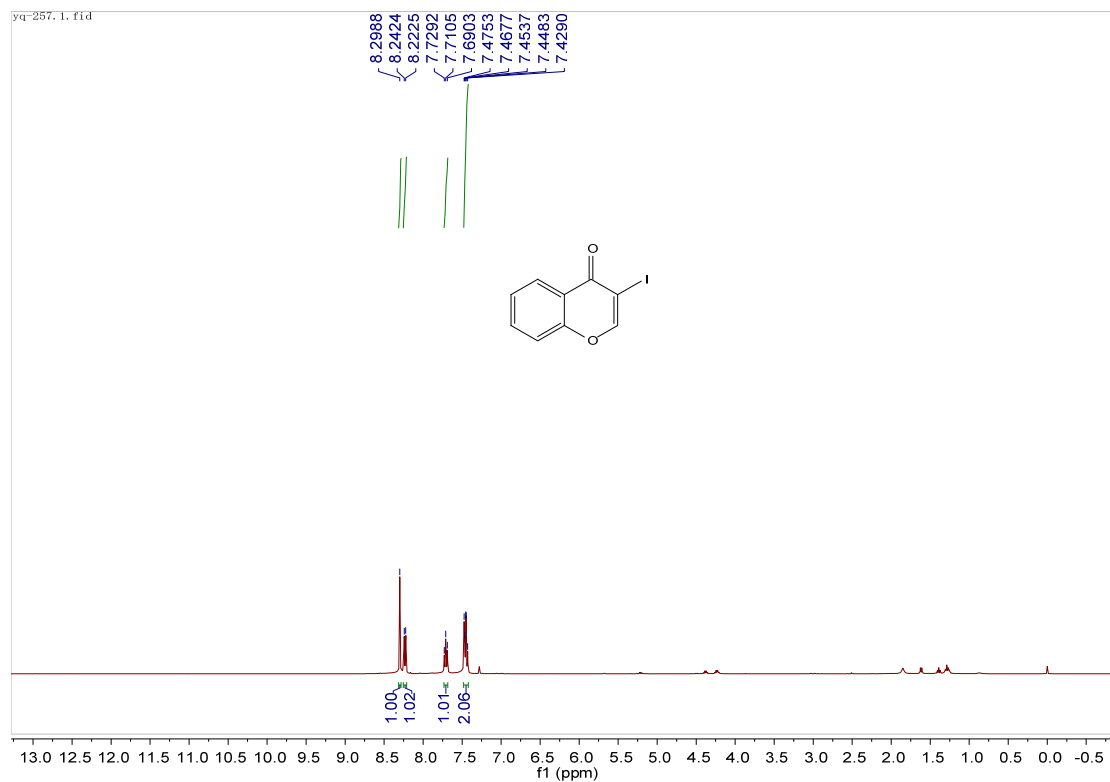

**<sup>1</sup>H NMR spectrum of 2a**

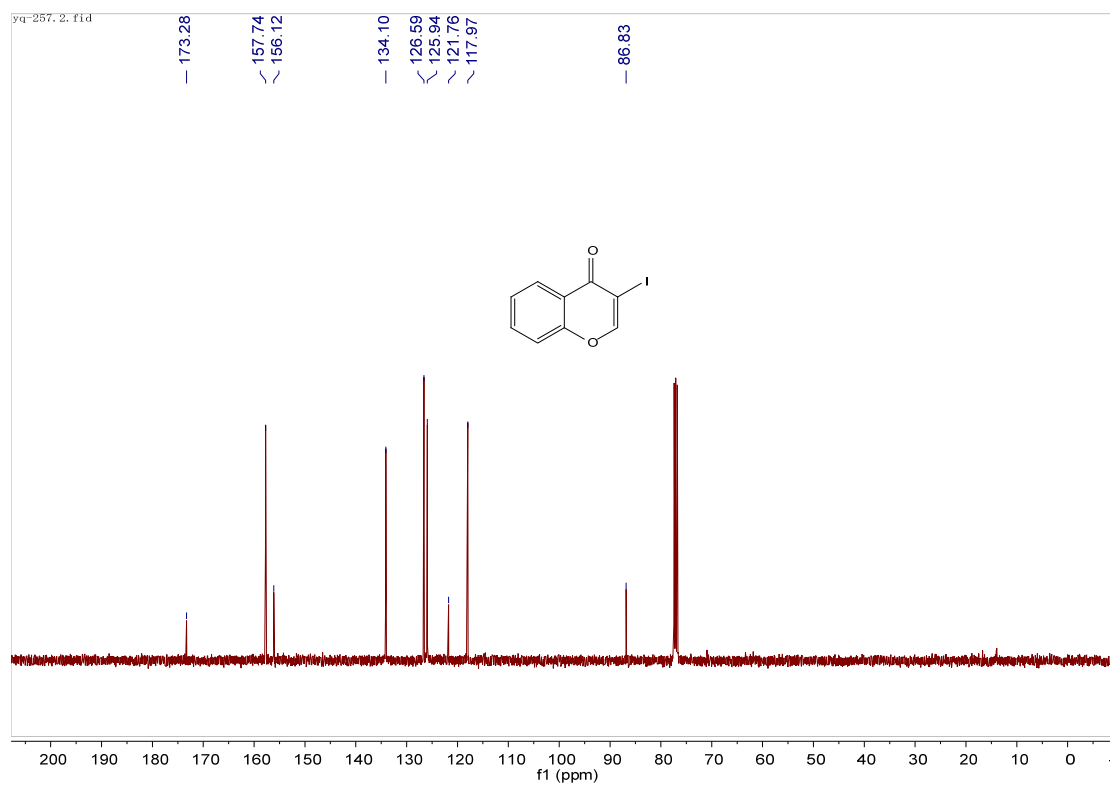

**<sup>13</sup>C NMR spectrum of 2a**

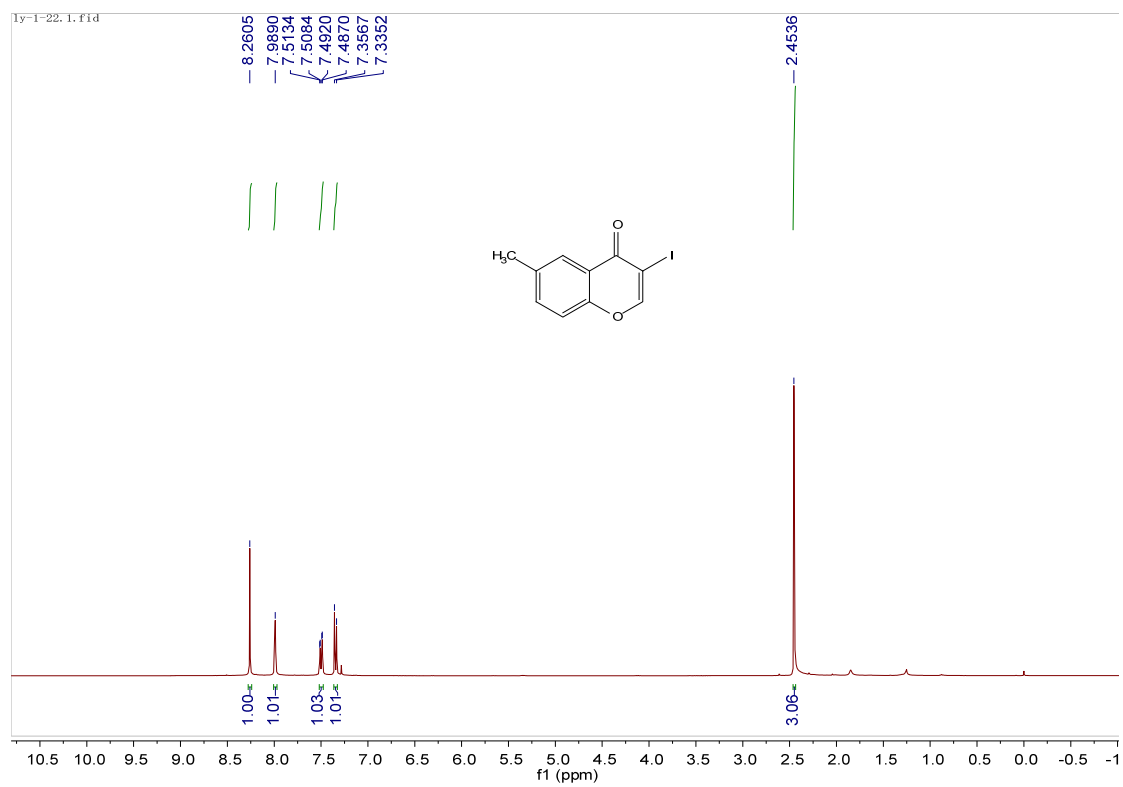

**<sup>1</sup>H NMR spectrum of 2b**

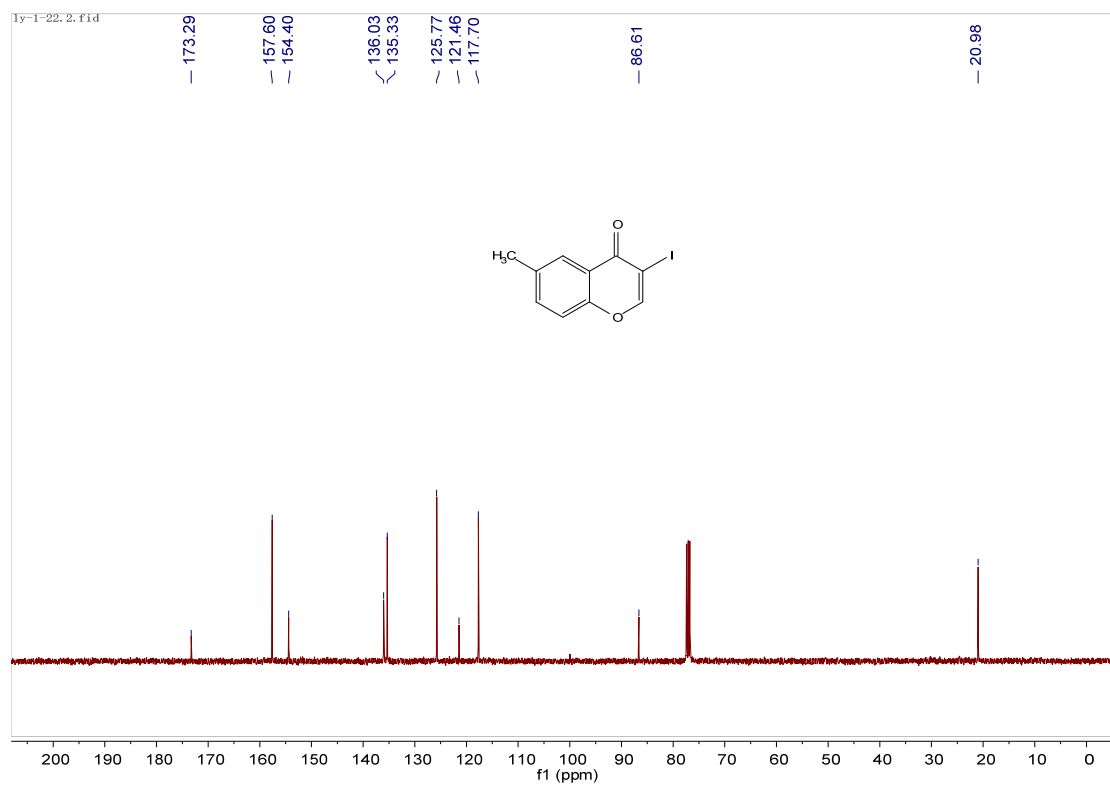

**<sup>13</sup>C NMR spectrum of 2b**

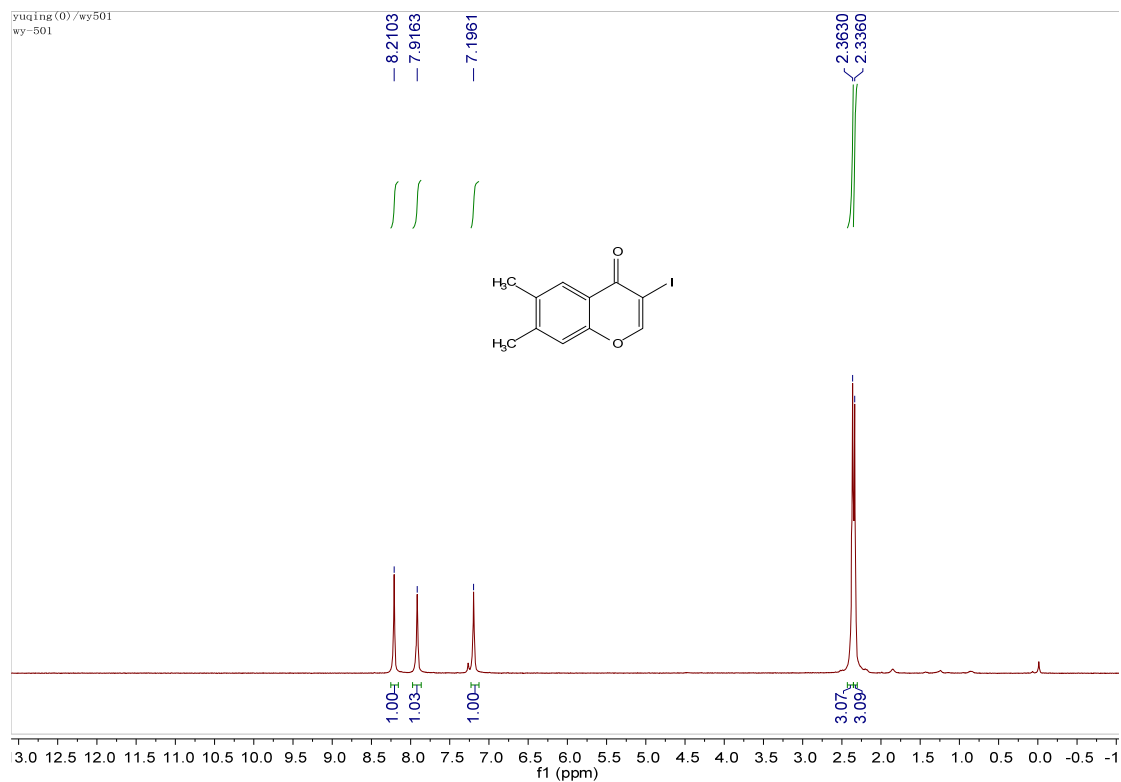

**<sup>1</sup>H NMR spectrum of 2c**

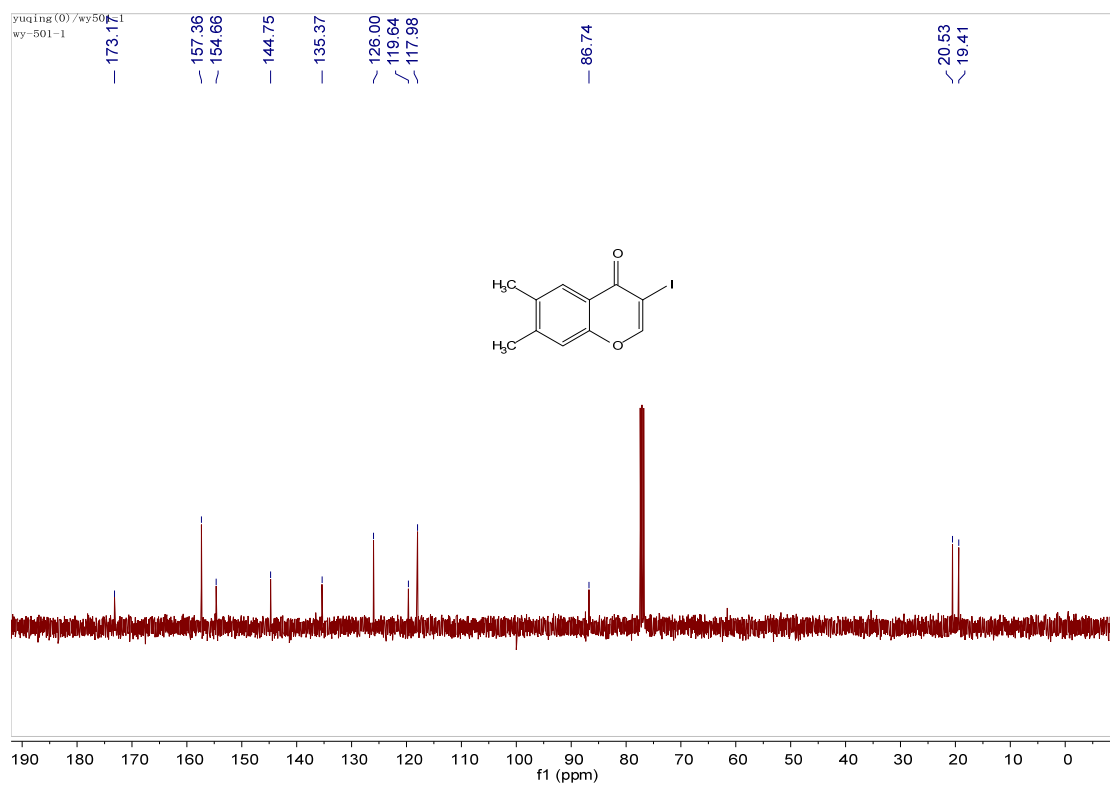

**<sup>13</sup>C NMR spectrum of 2c**

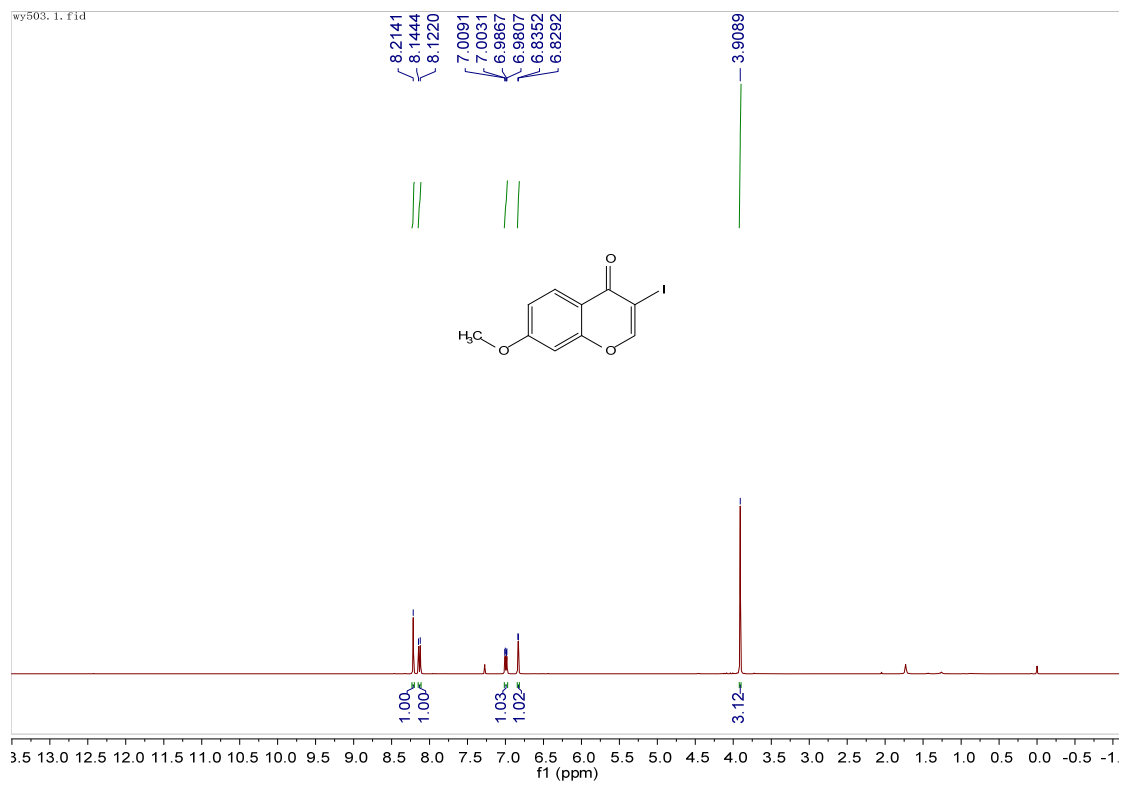

**<sup>1</sup>H NMR spectrum of 2d**

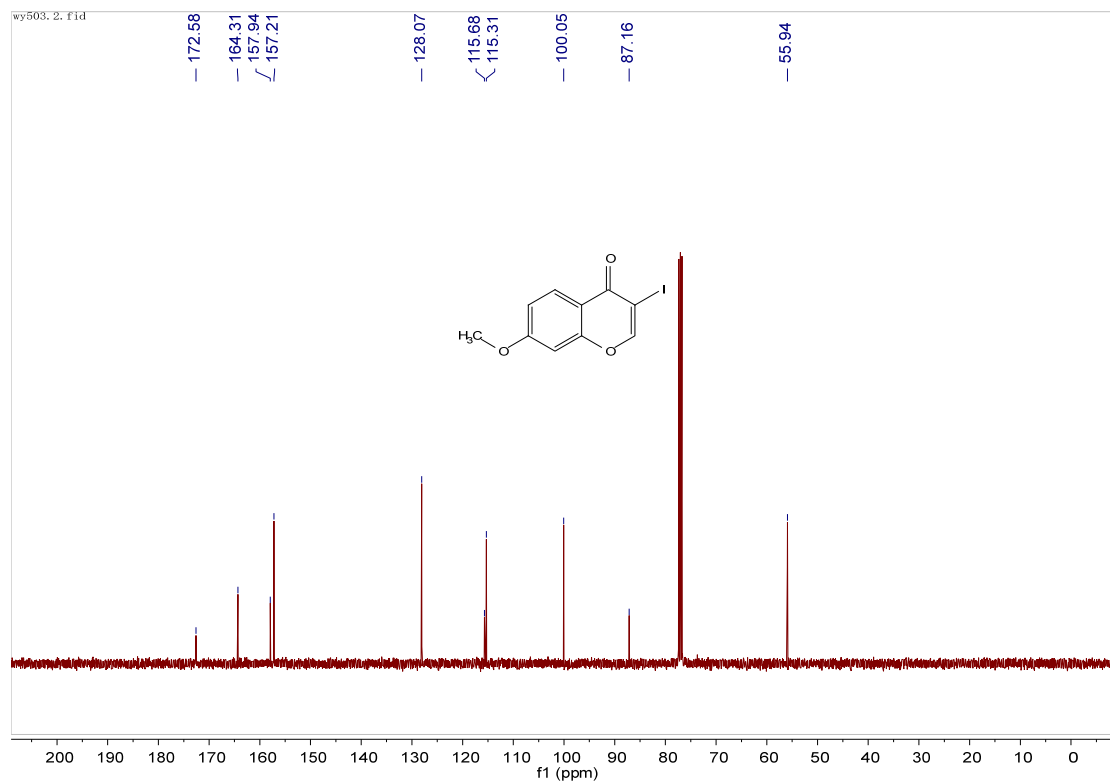

**<sup>13</sup>C NMR spectrum of 2d**

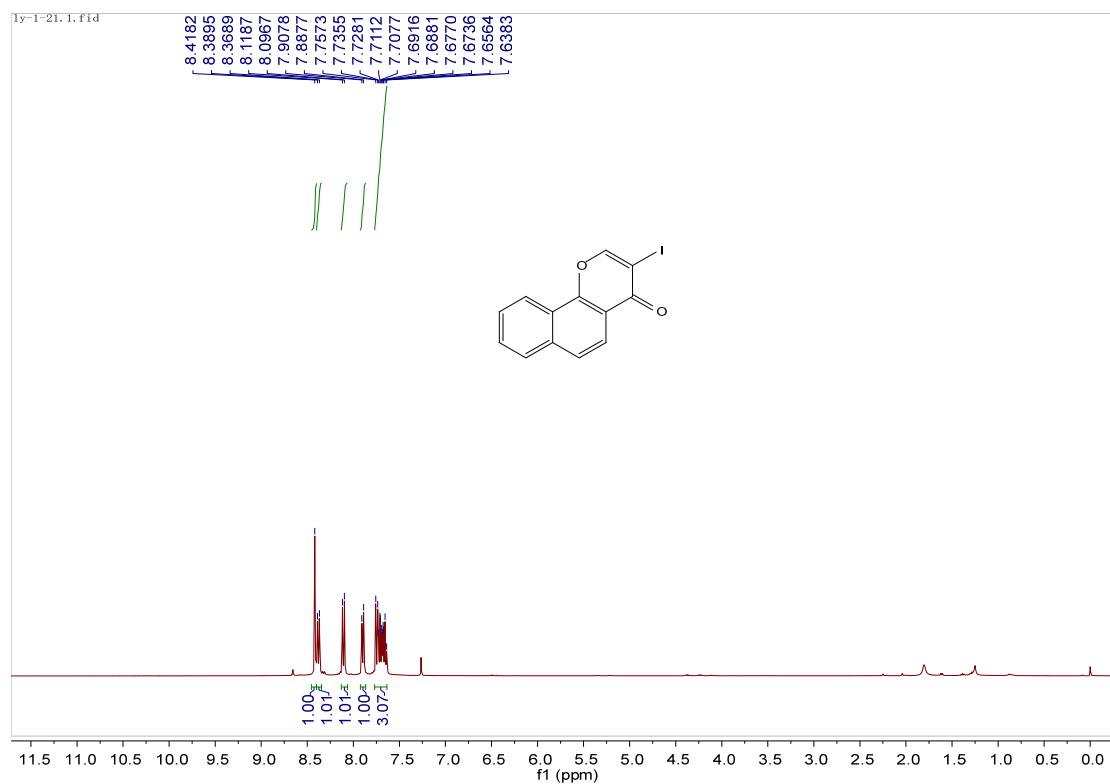

**<sup>1</sup>H NMR spectrum of 2e**

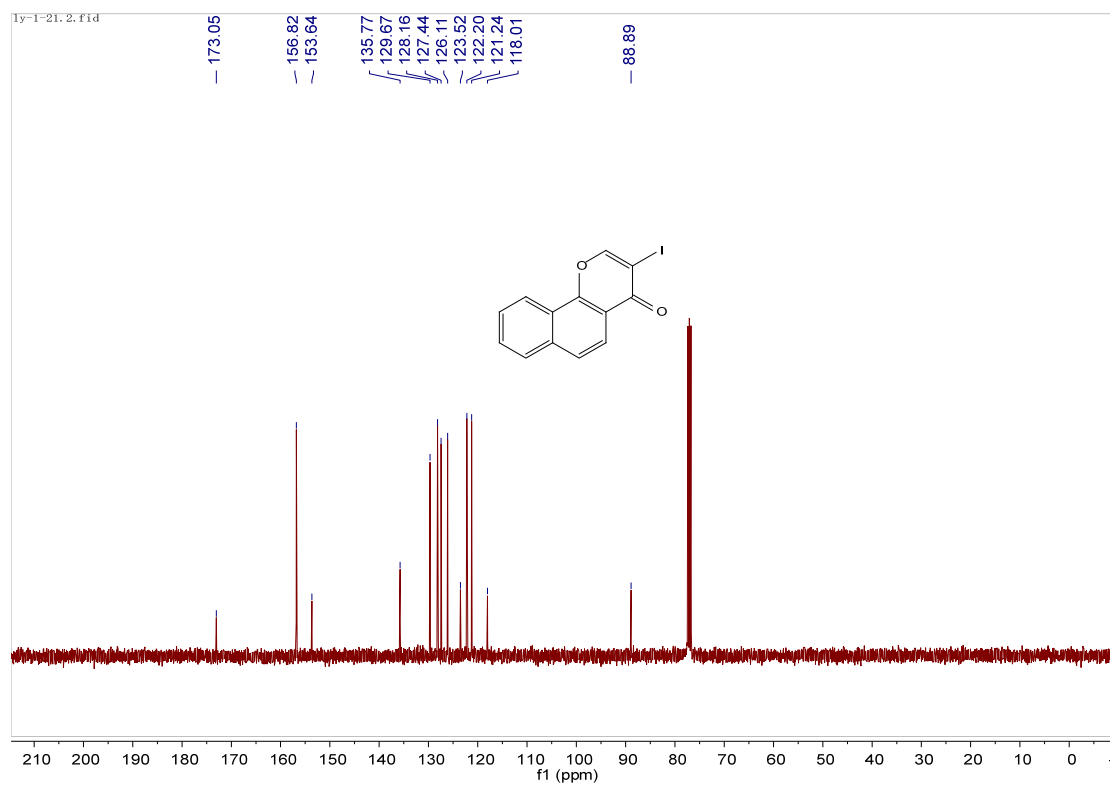

**<sup>13</sup>C NMR spectrum of 2e**

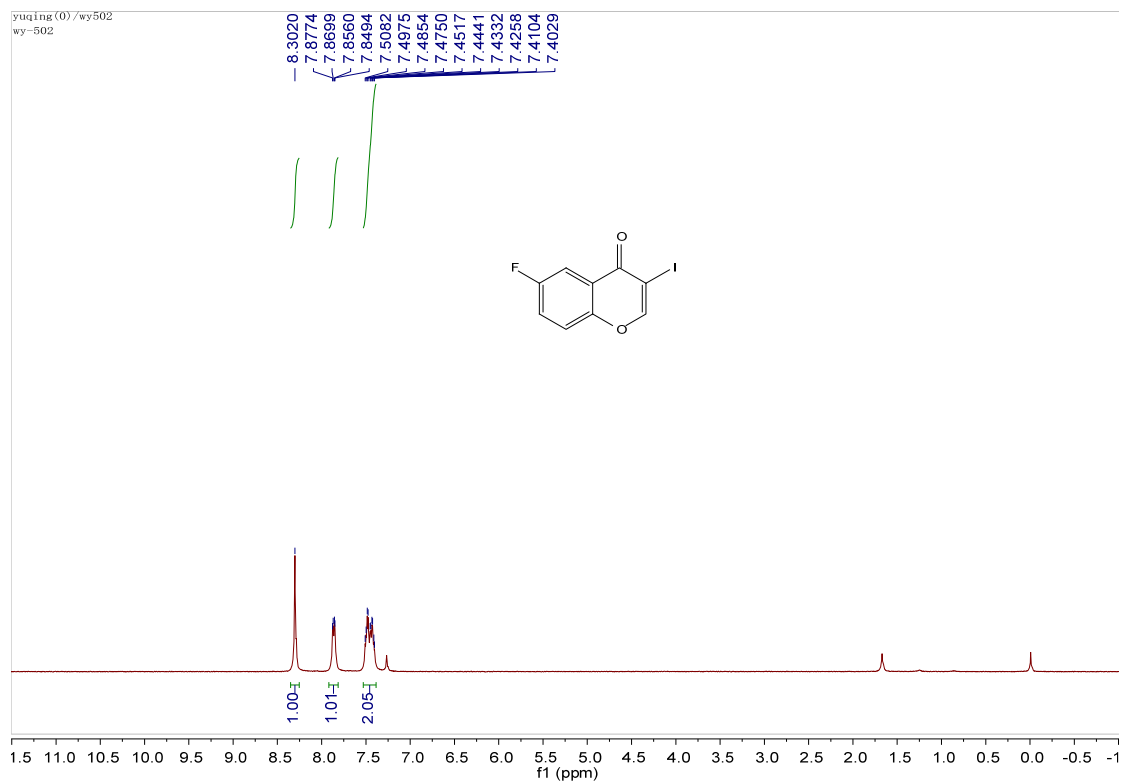

**<sup>1</sup>H NMR spectrum of 2f**

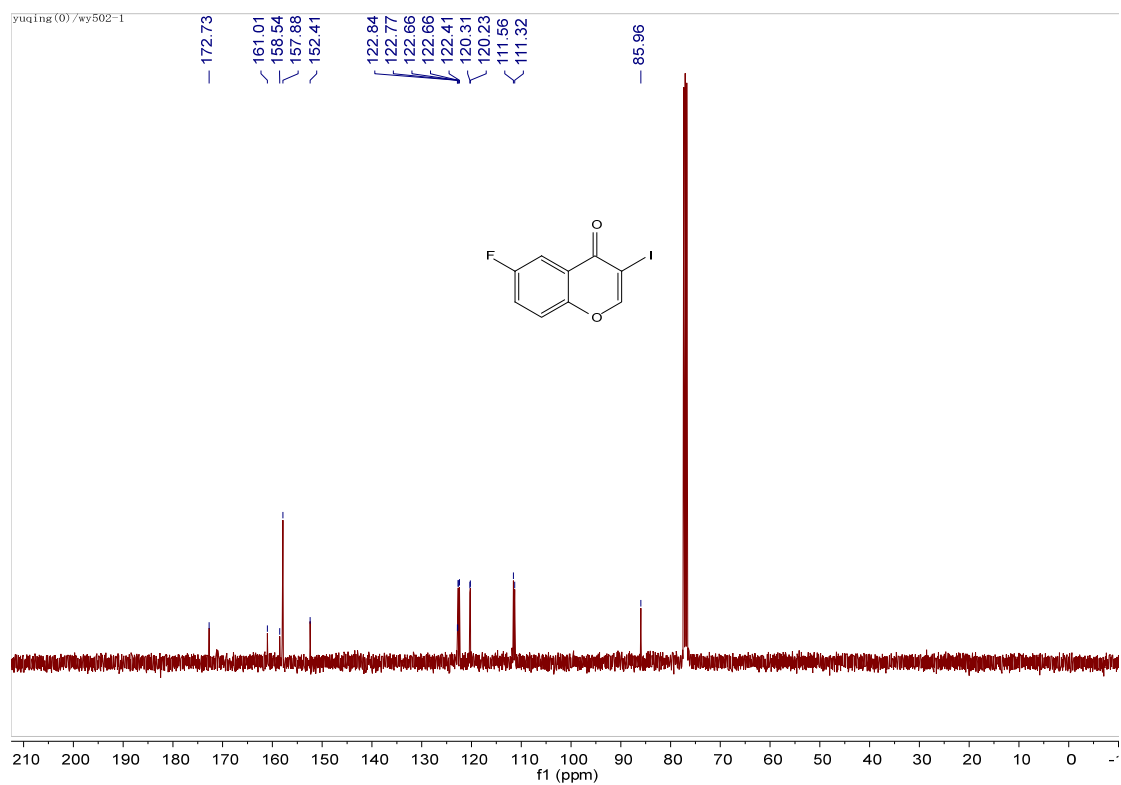

**<sup>13</sup>C NMR spectrum of 2f**

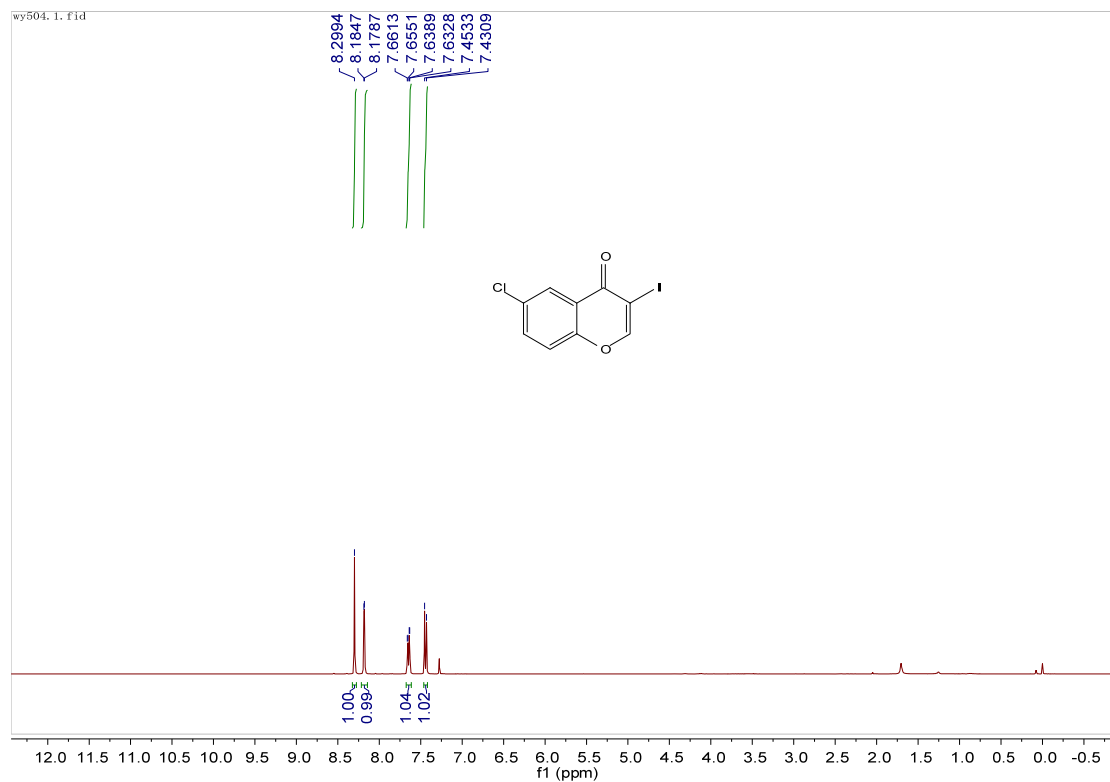

**<sup>1</sup>H NMR spectrum of 2g**

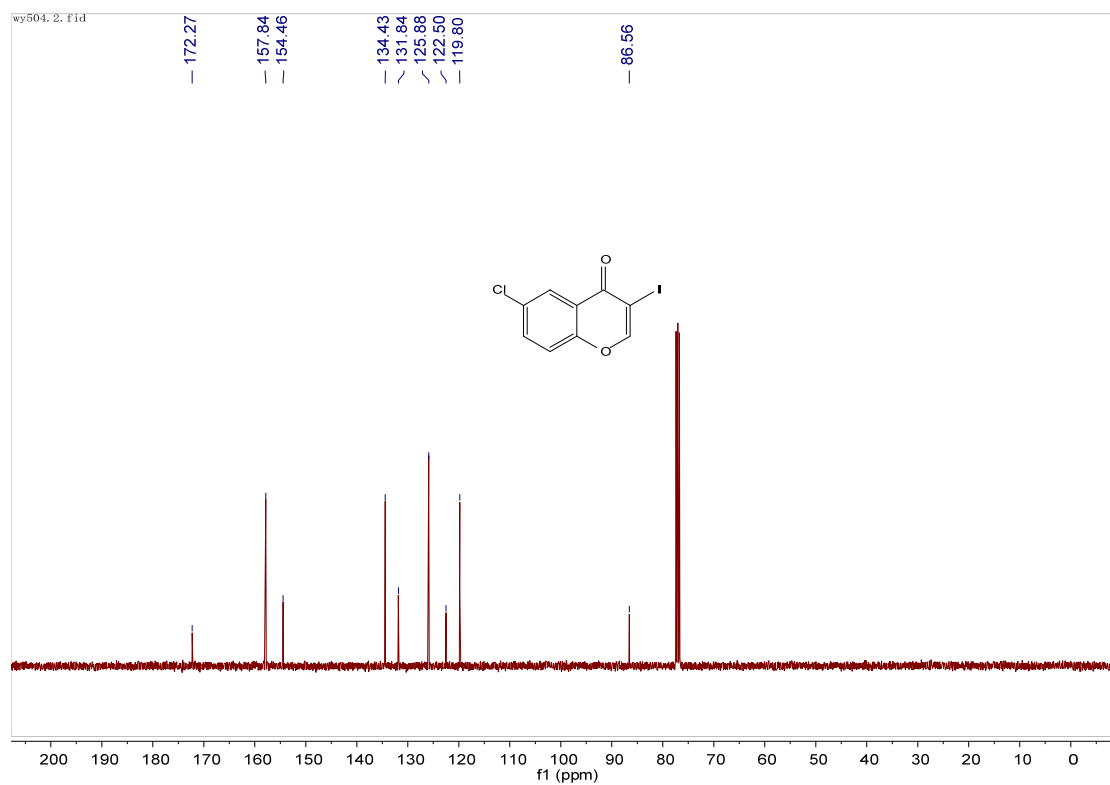

**<sup>13</sup>C NMR spectrum of 2g**



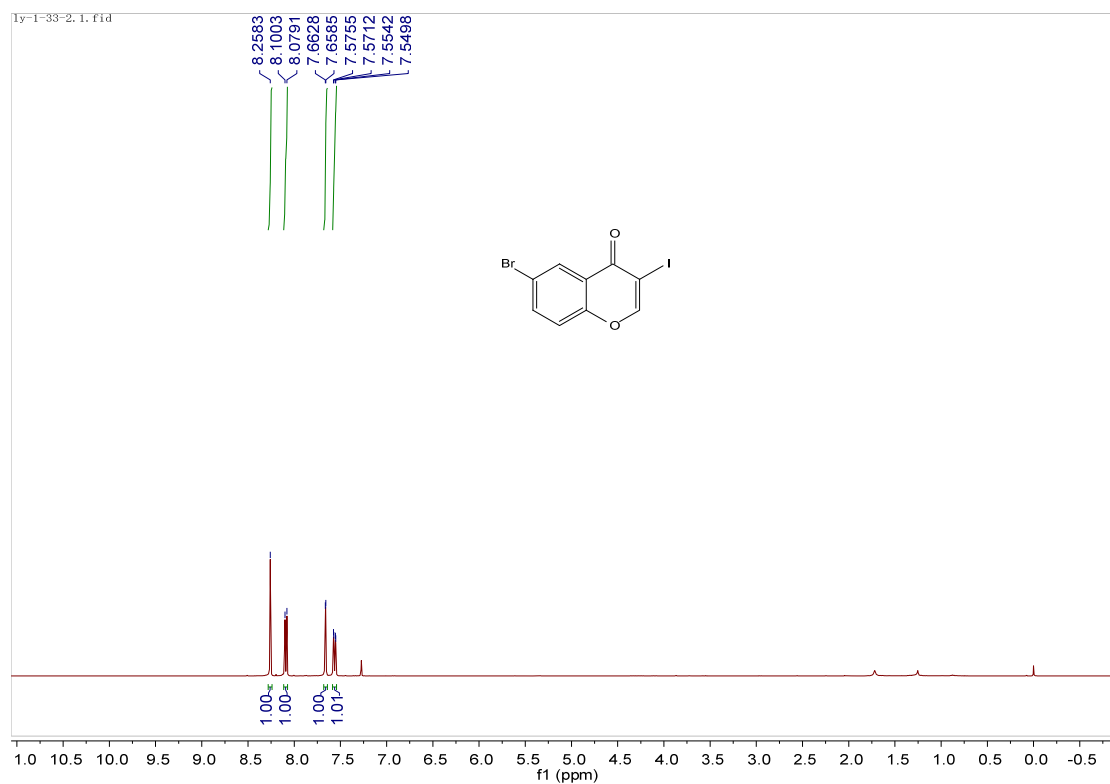

**<sup>1</sup>H NMR spectrum of 2h**

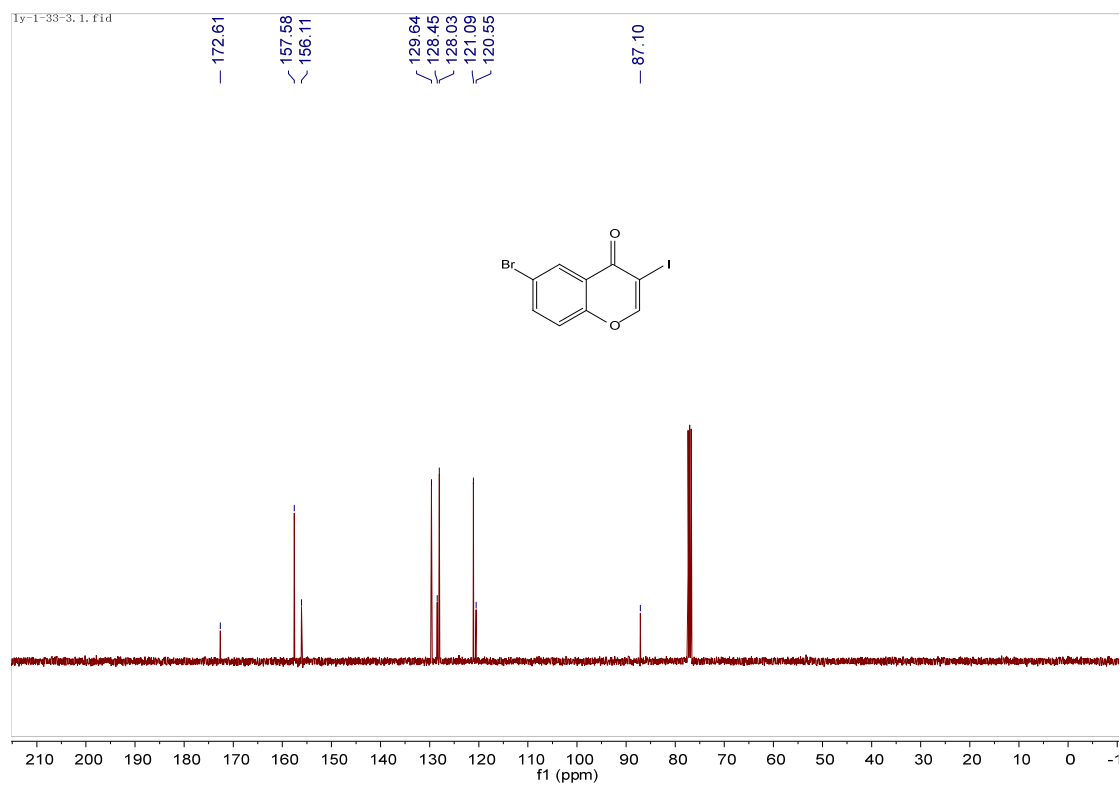

**<sup>13</sup>C NMR spectrum of 2h**

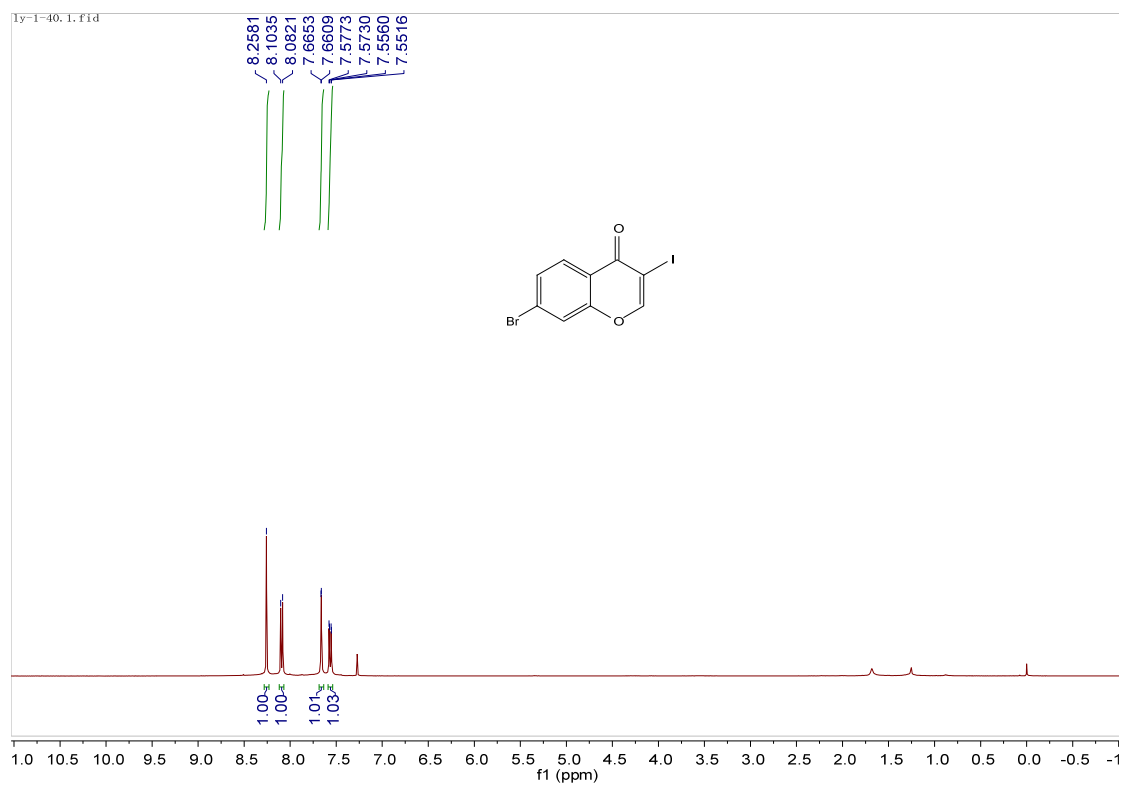

**<sup>1</sup>H NMR spectrum of 2i**

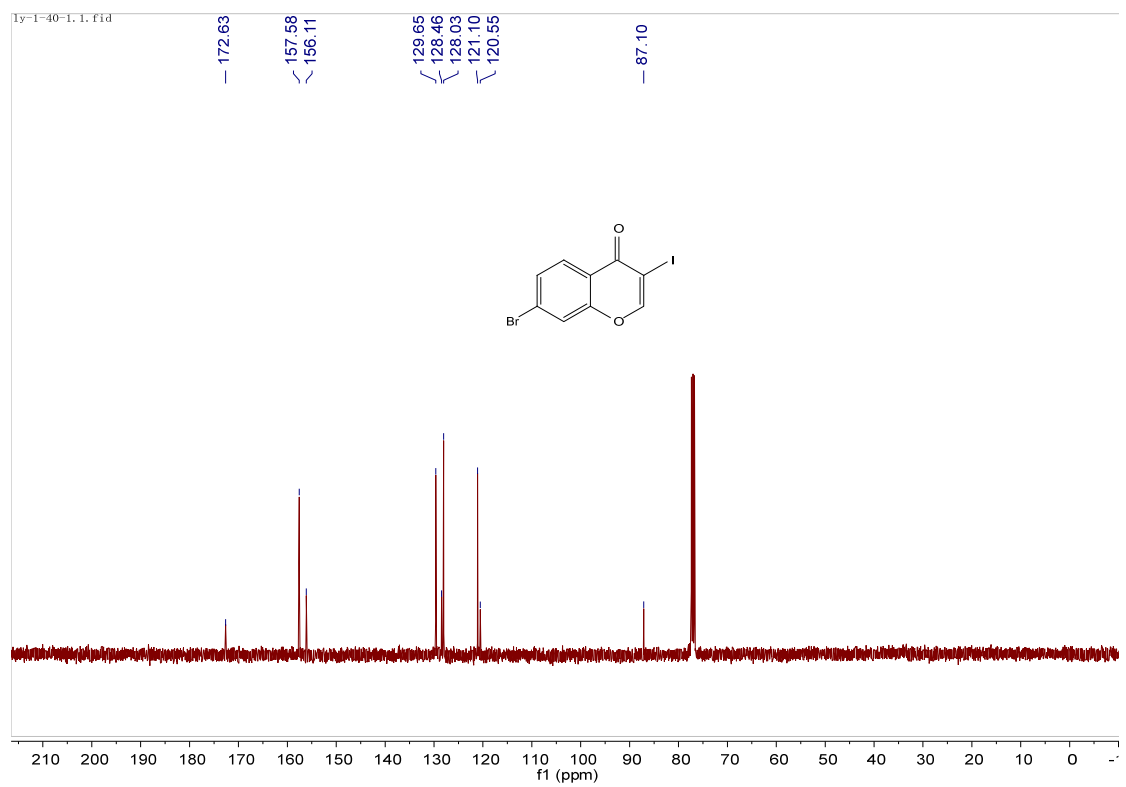

**<sup>13</sup>C NMR spectrum of 2i**

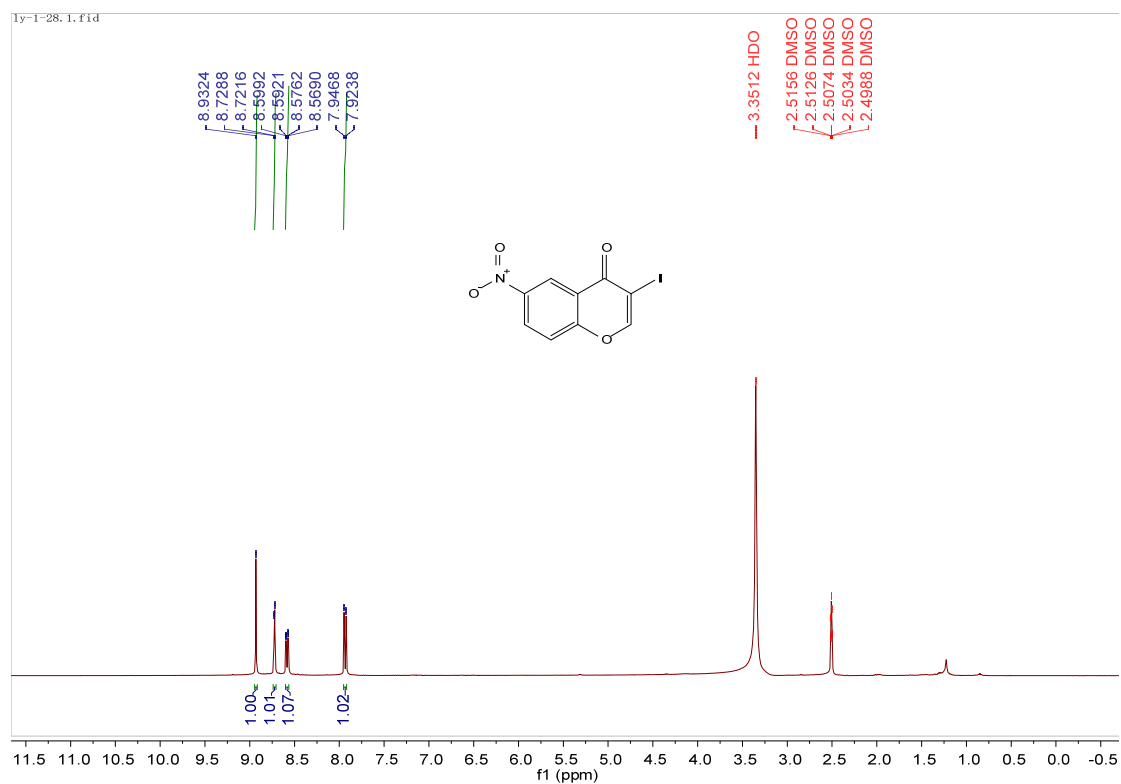

<sup>1</sup>H NMR spectrum of 2j

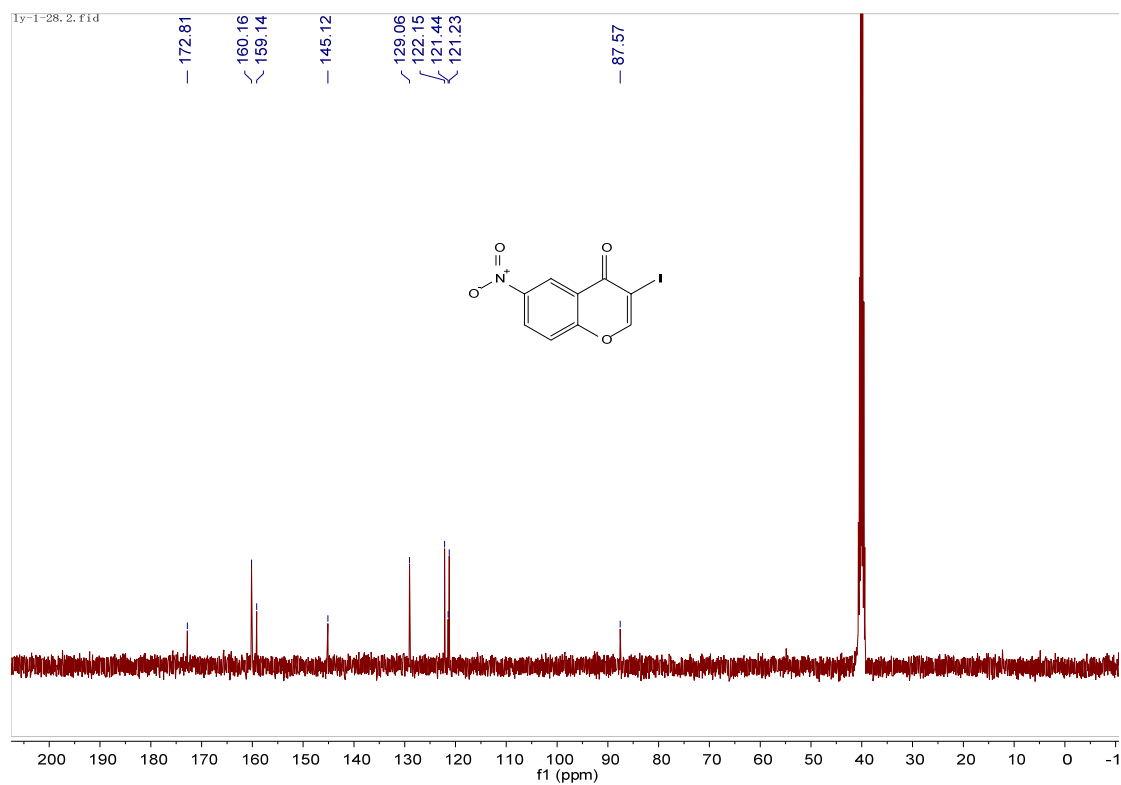

<sup>13</sup>C NMR spectrum of 2j

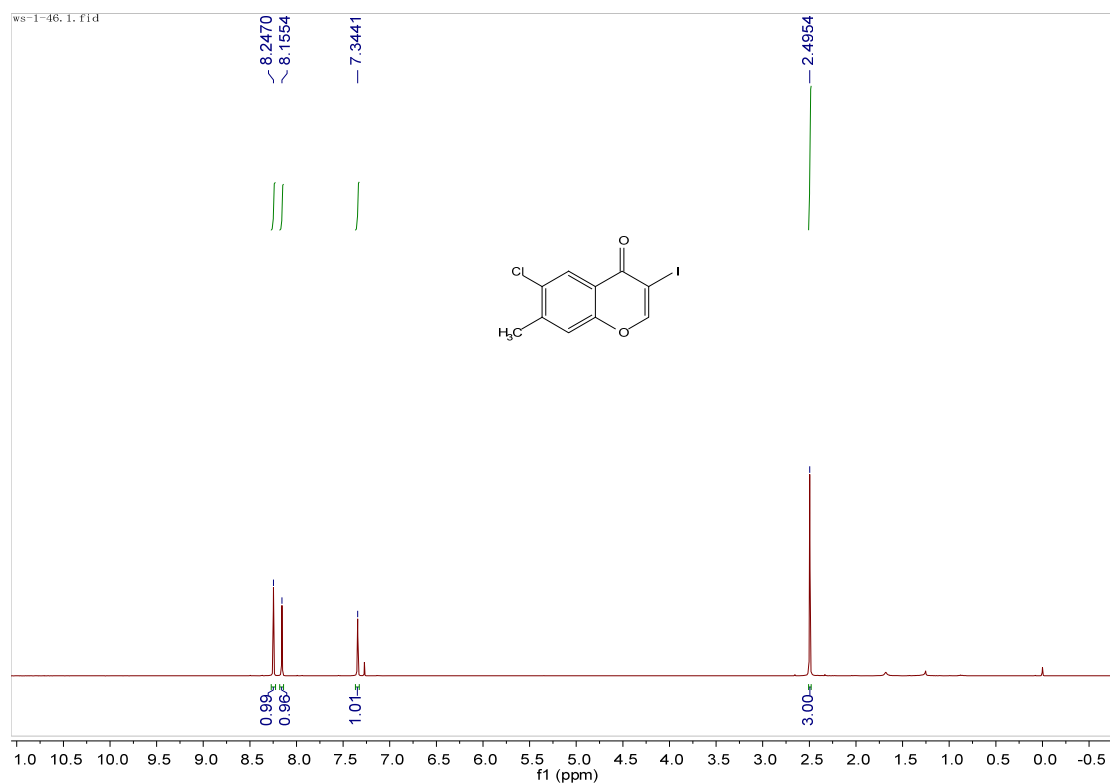

$^1\text{H}$  NMR spectrum of 2k

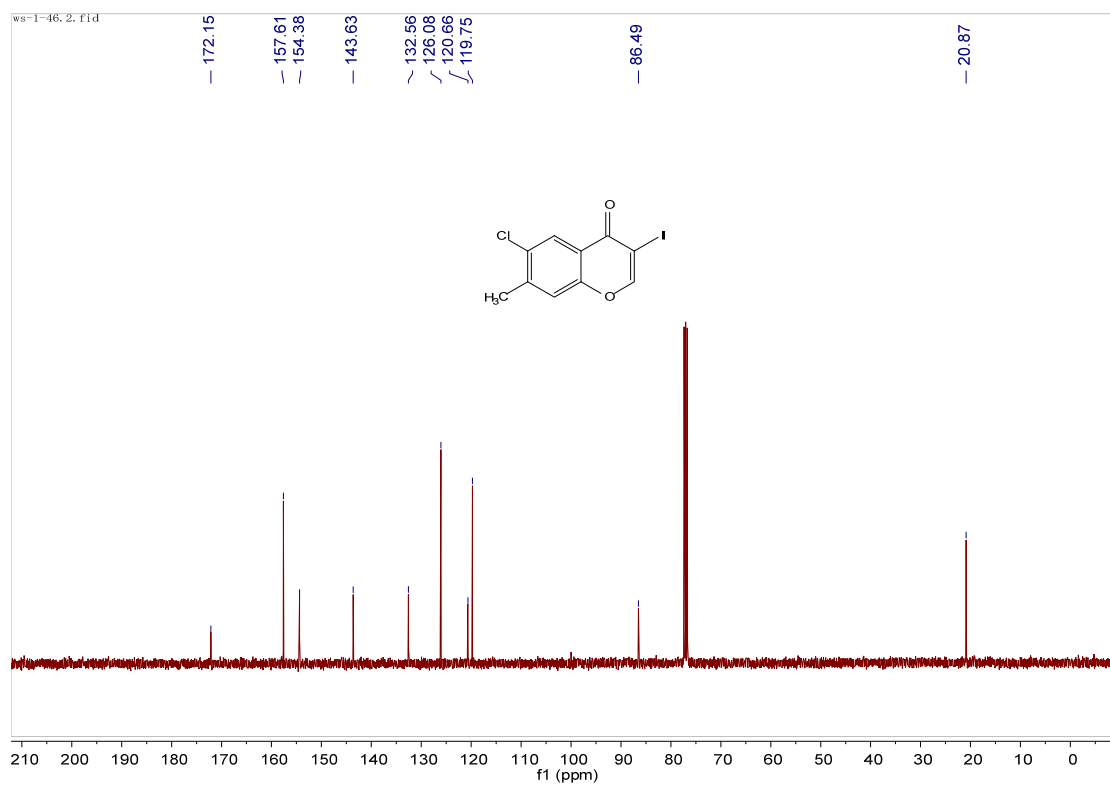

$^{13}\text{C}$  NMR spectrum of 2k

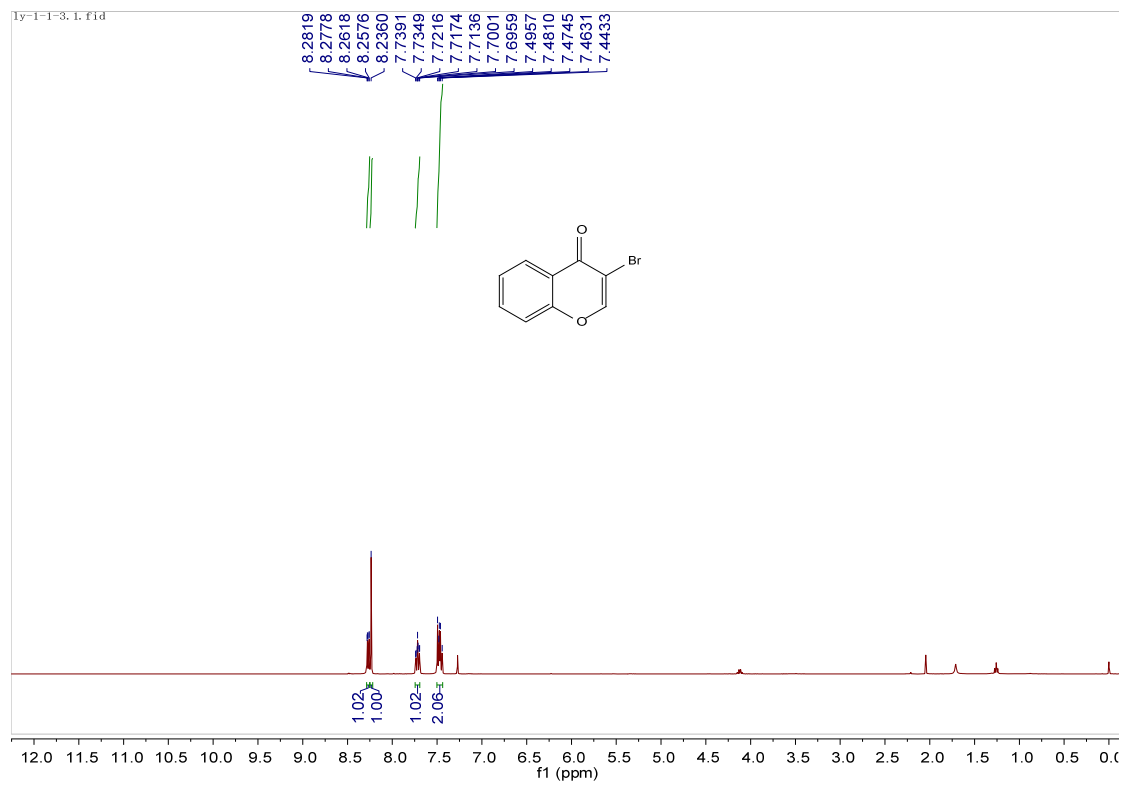

**<sup>1</sup>H NMR spectrum of 2l**

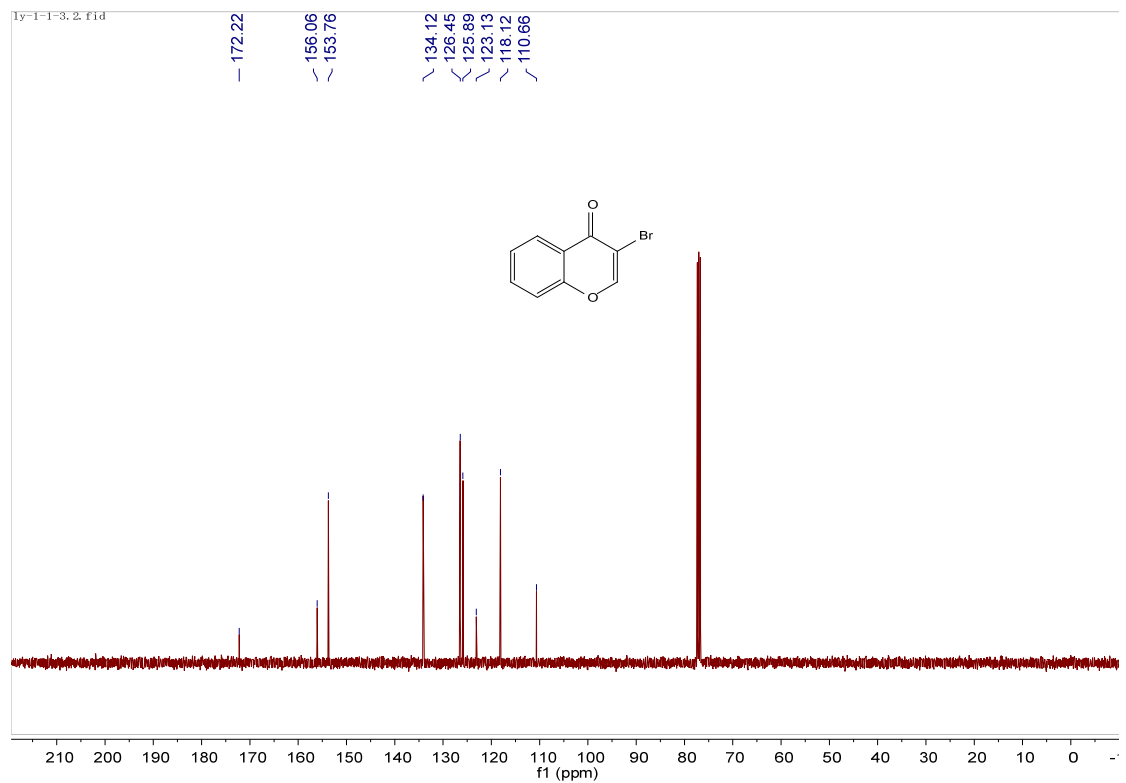

**<sup>13</sup>C NMR spectrum of 2l**

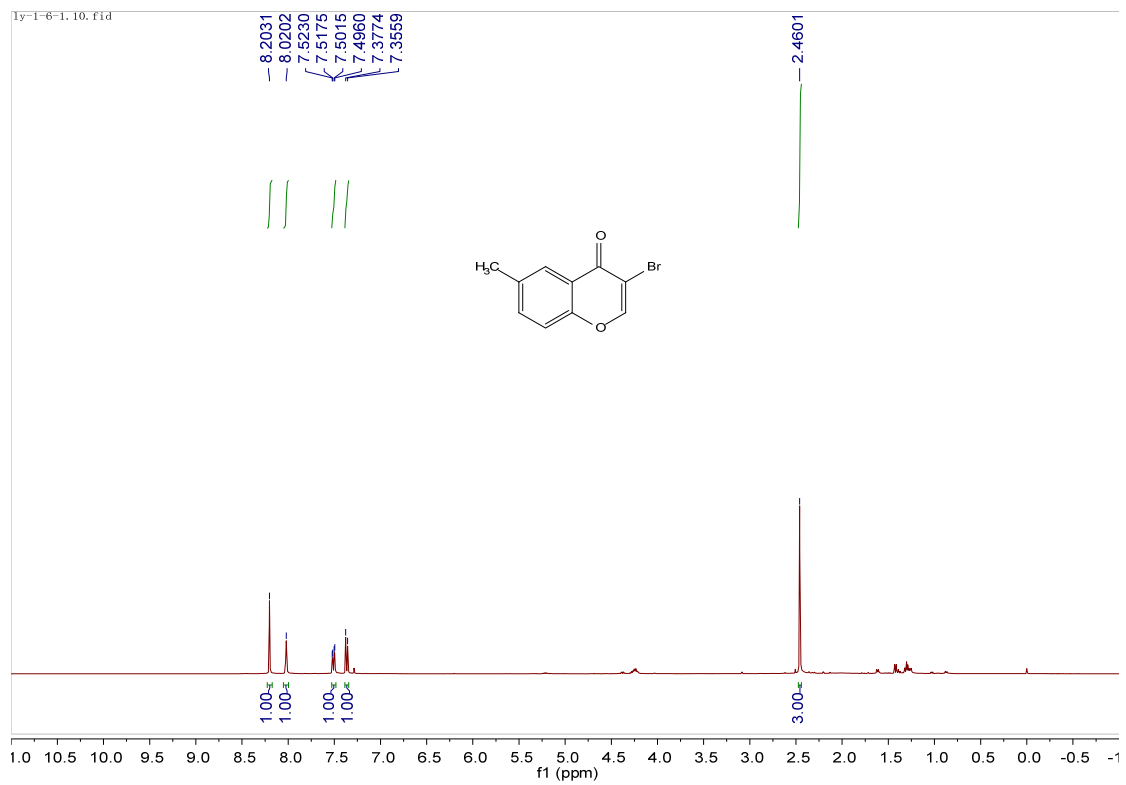

**$^1\text{H}$  NMR spectrum of 2m**

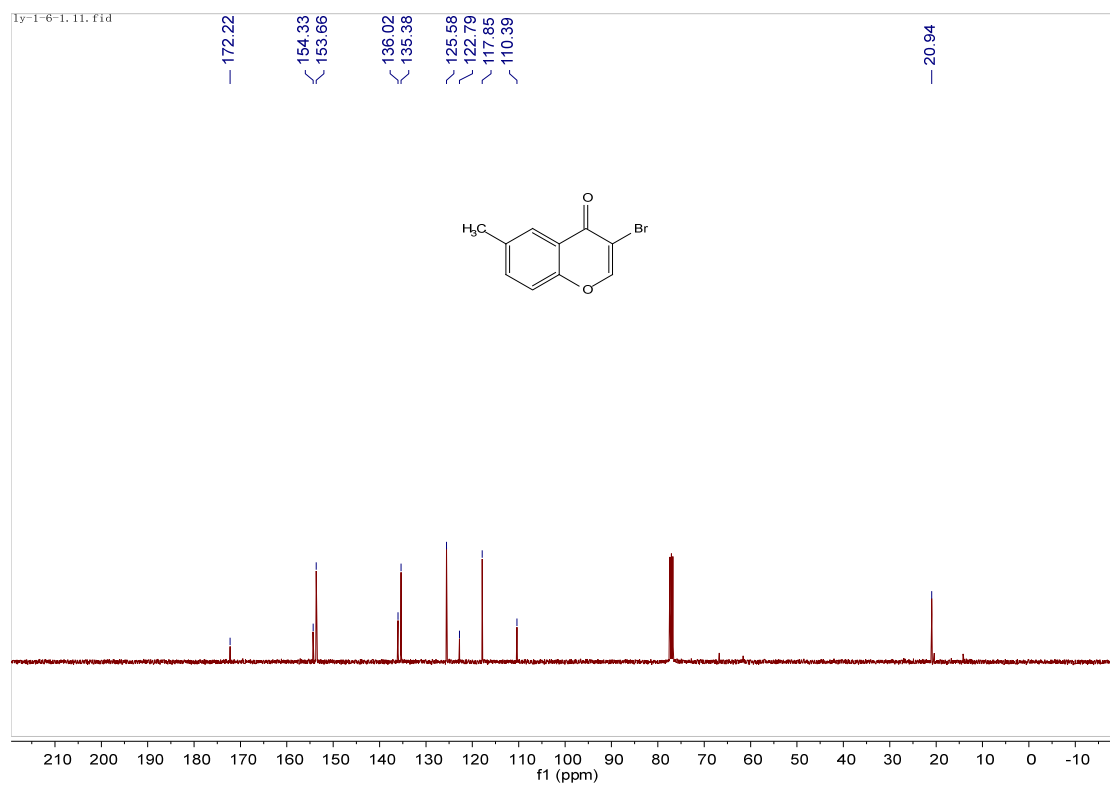

**$^{13}\text{C}$  NMR spectrum of 2m**

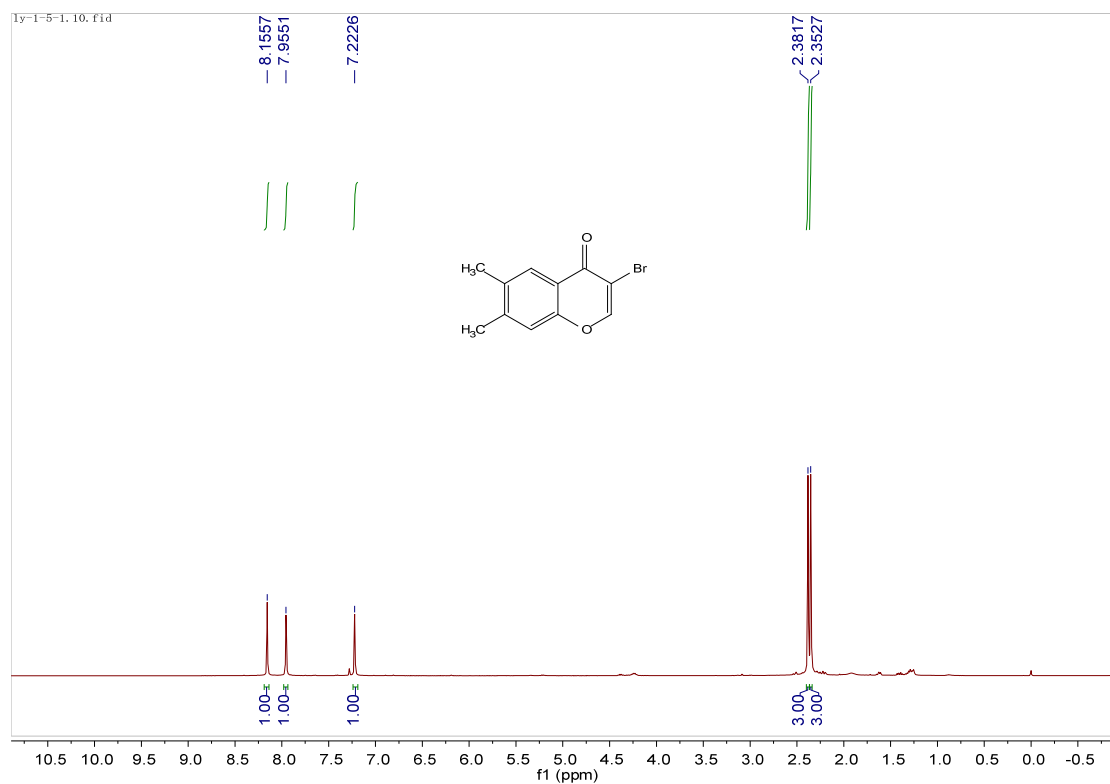

**<sup>1</sup>H NMR spectrum of 2n**

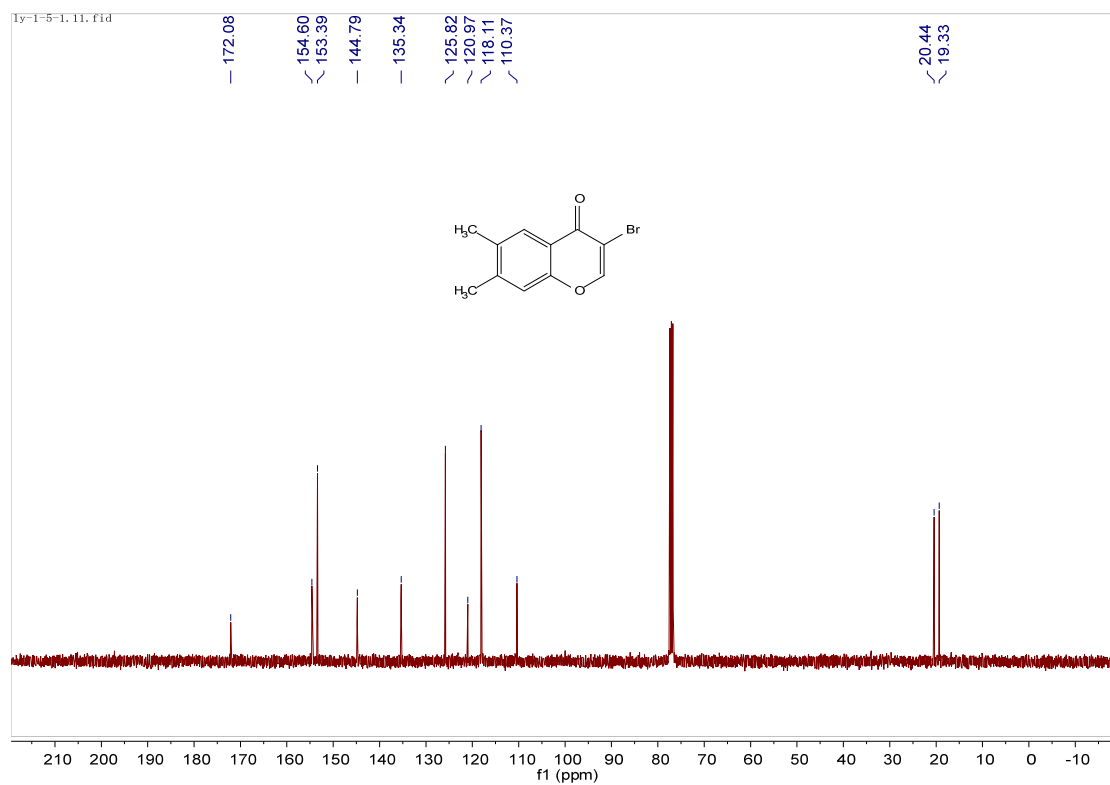

**<sup>13</sup>C NMR spectrum of 2n**

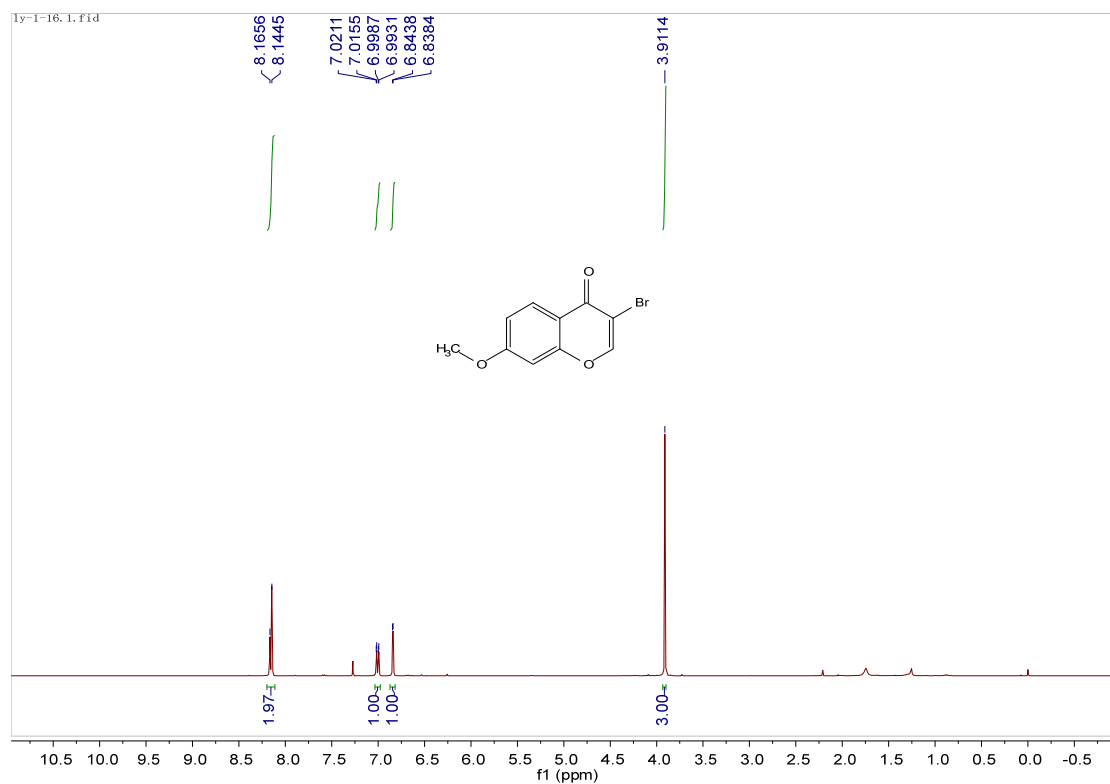

**<sup>1</sup>H NMR spectrum of 2o**

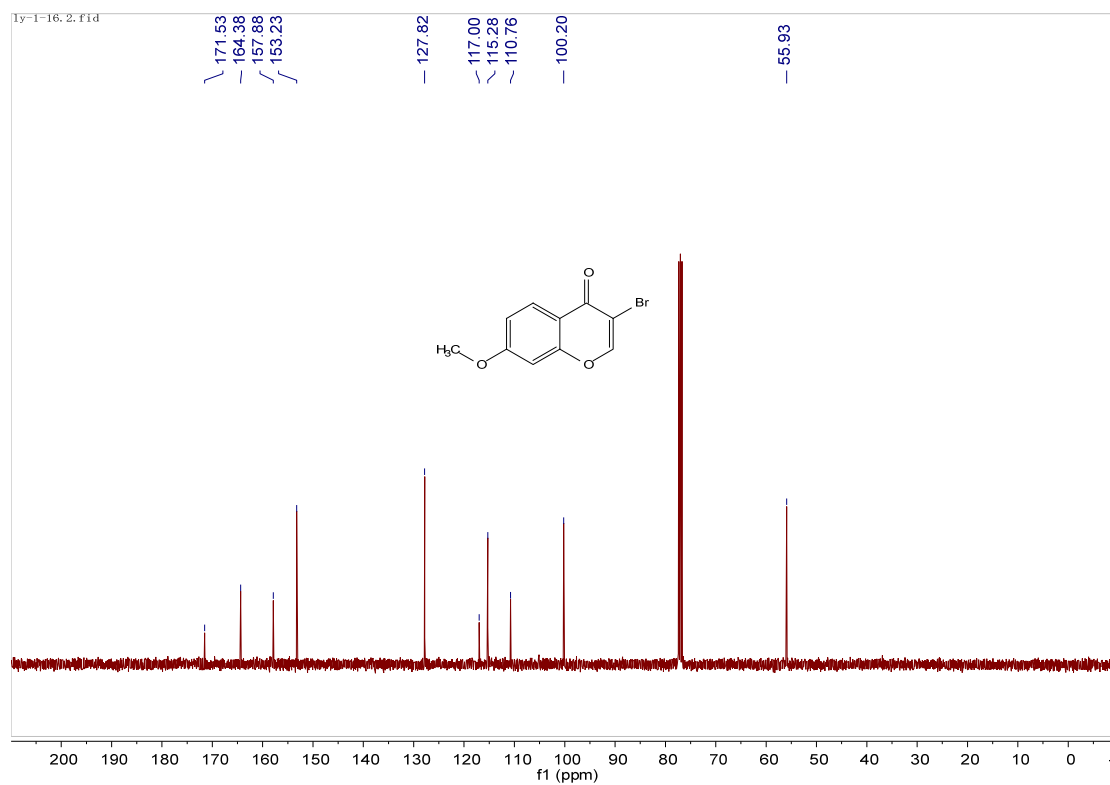

**<sup>13</sup>C NMR spectrum of 2o**



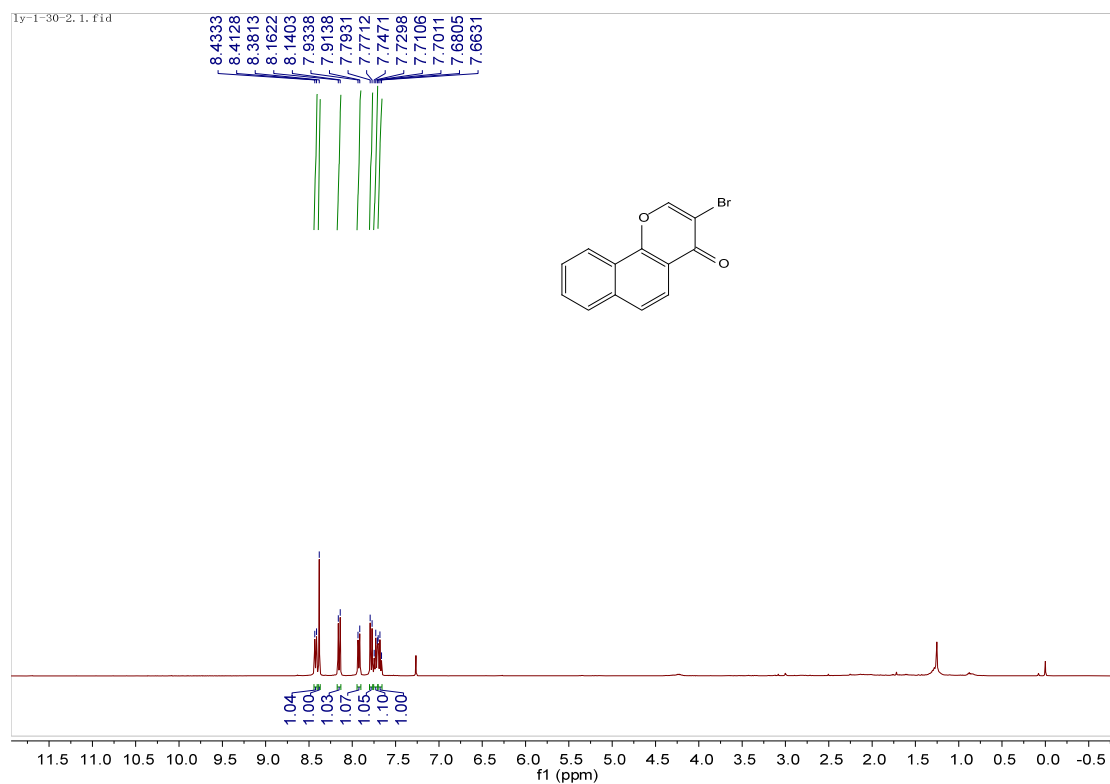

<sup>1</sup>H NMR spectrum of 2p

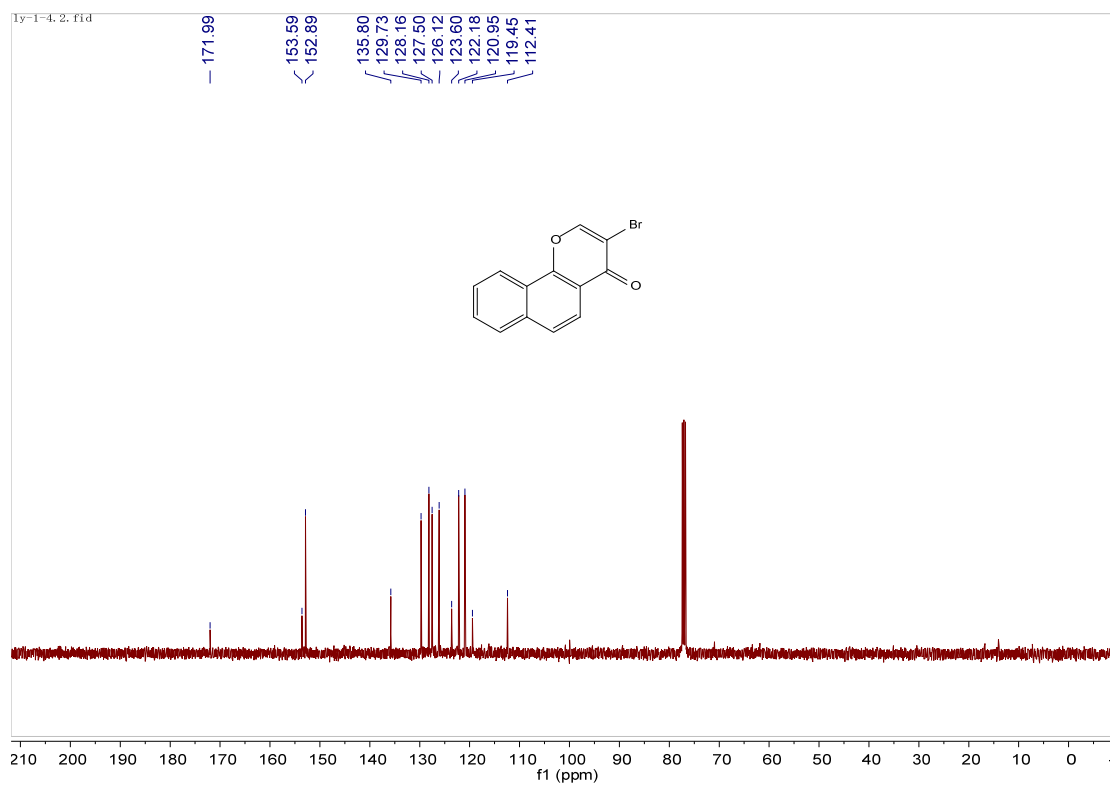

<sup>13</sup>C NMR spectrum of 2p

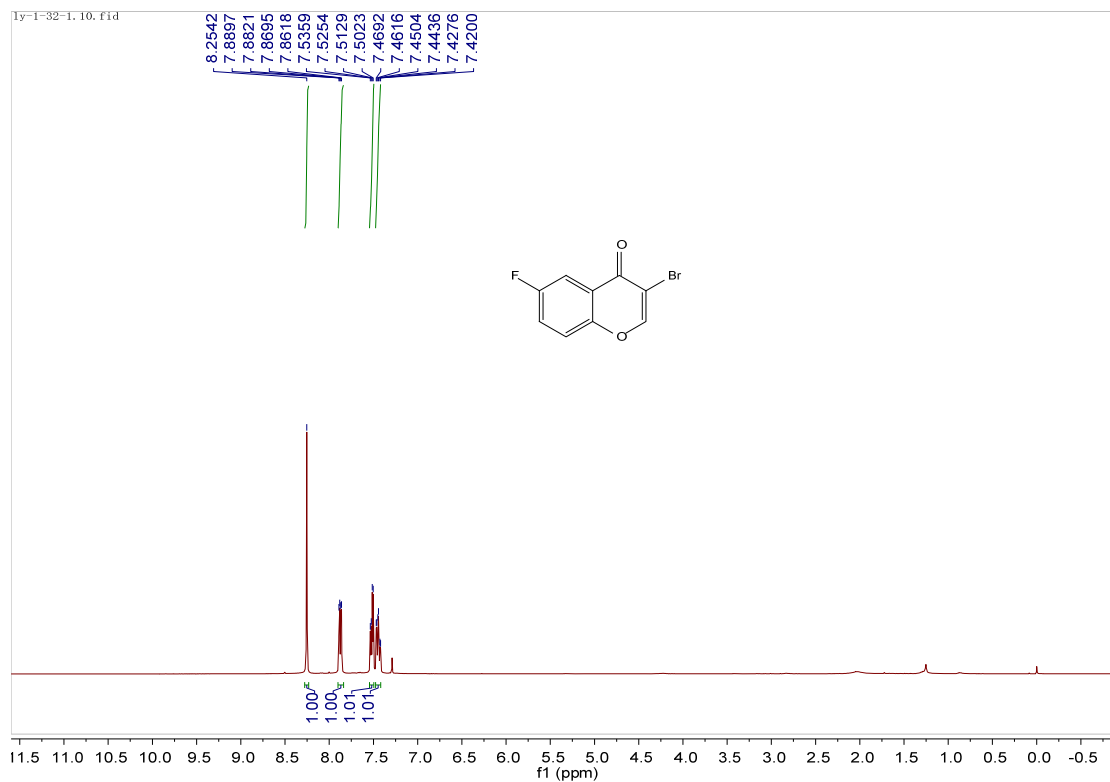

**<sup>1</sup>H NMR spectrum of 2q**

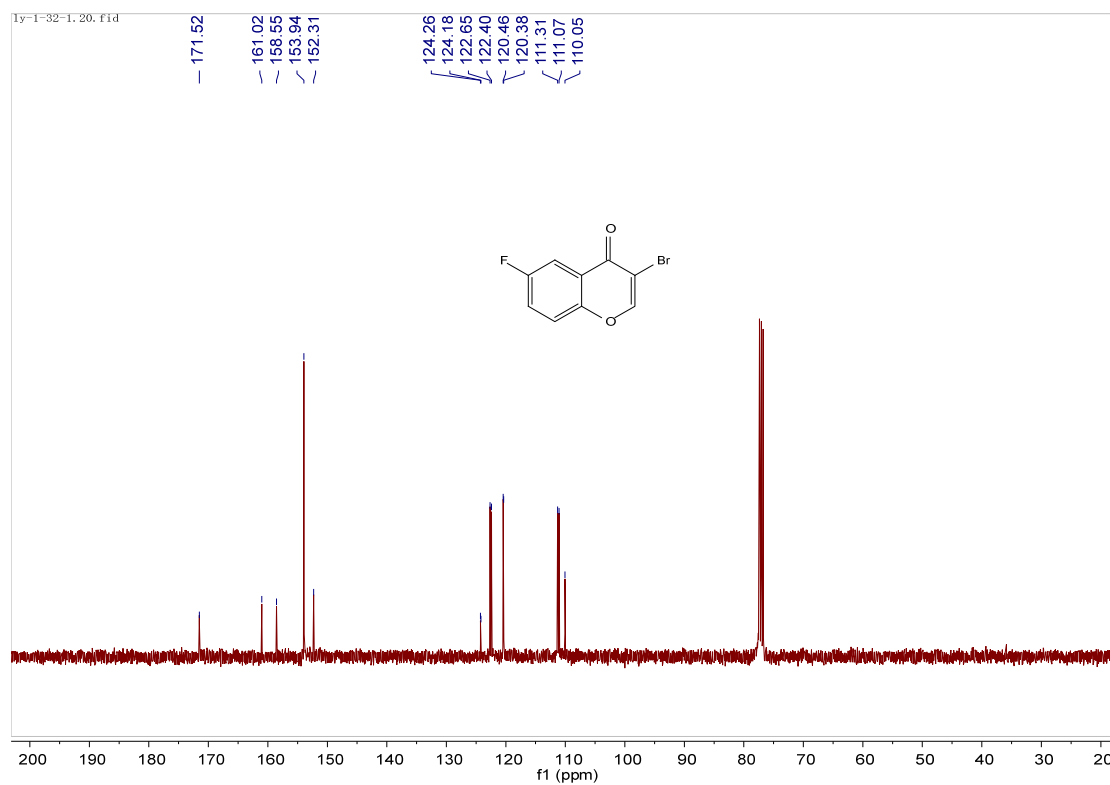

**<sup>13</sup>C NMR spectrum of 2q**

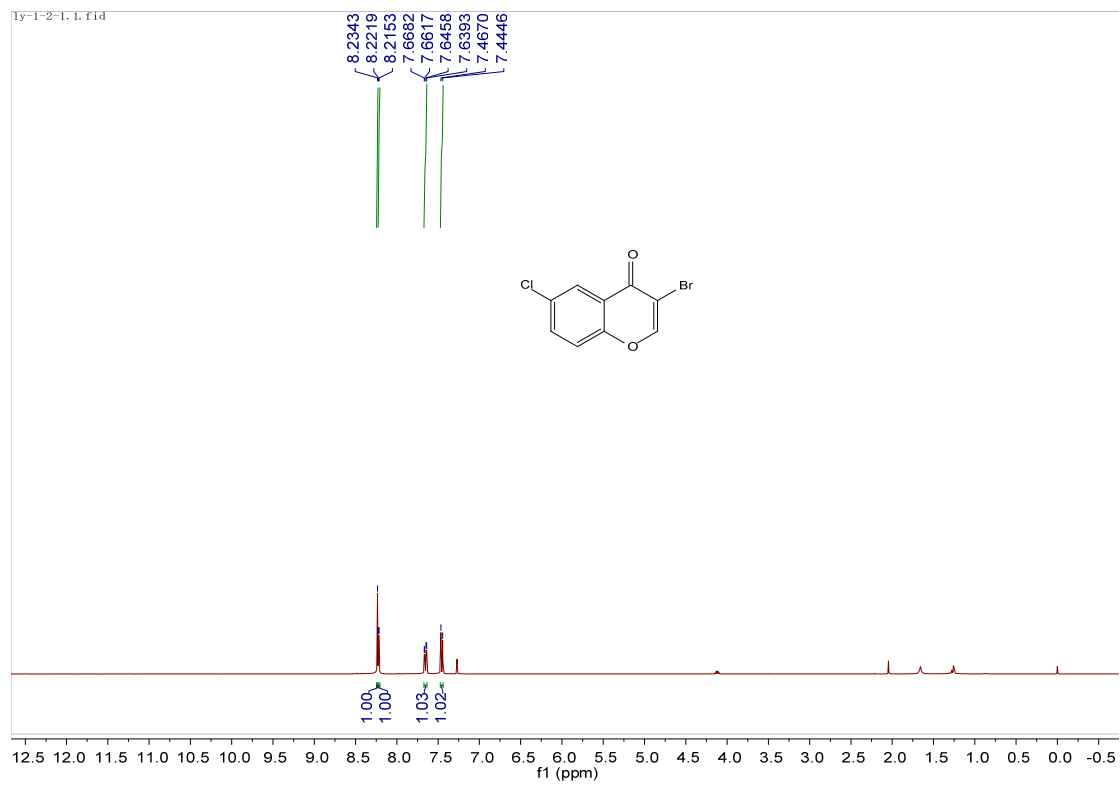

**<sup>1</sup>H NMR spectrum of 2r**

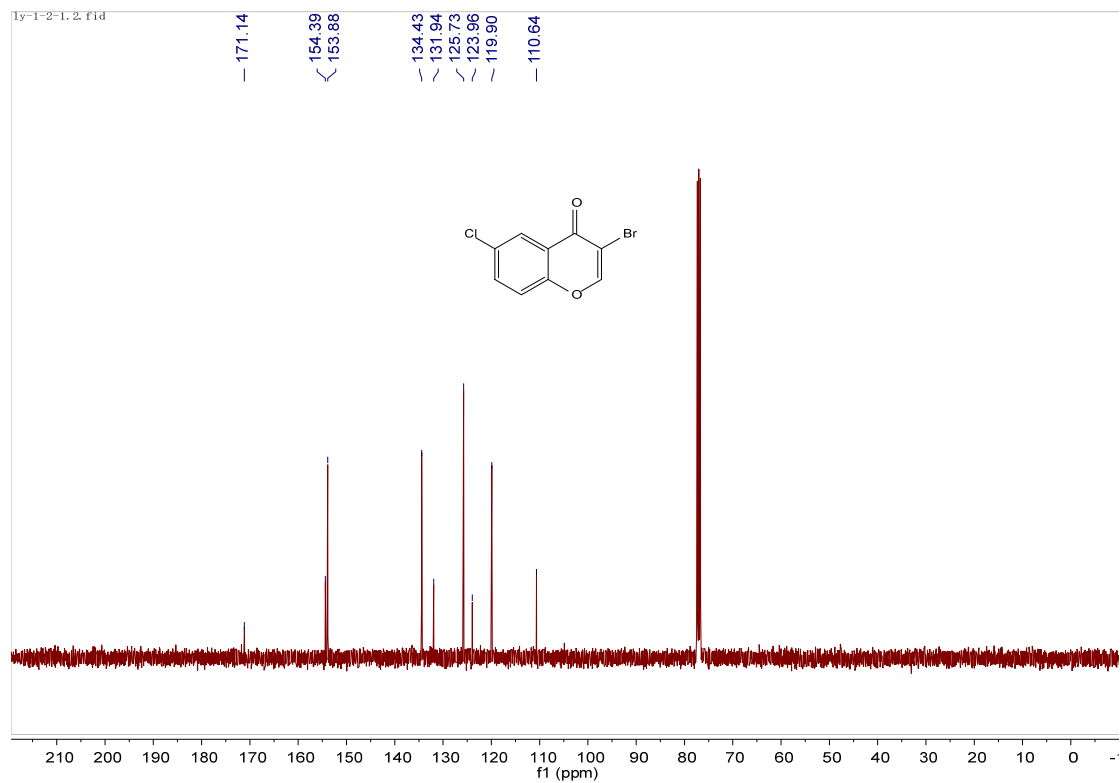

**<sup>13</sup>C NMR spectrum of 2r**

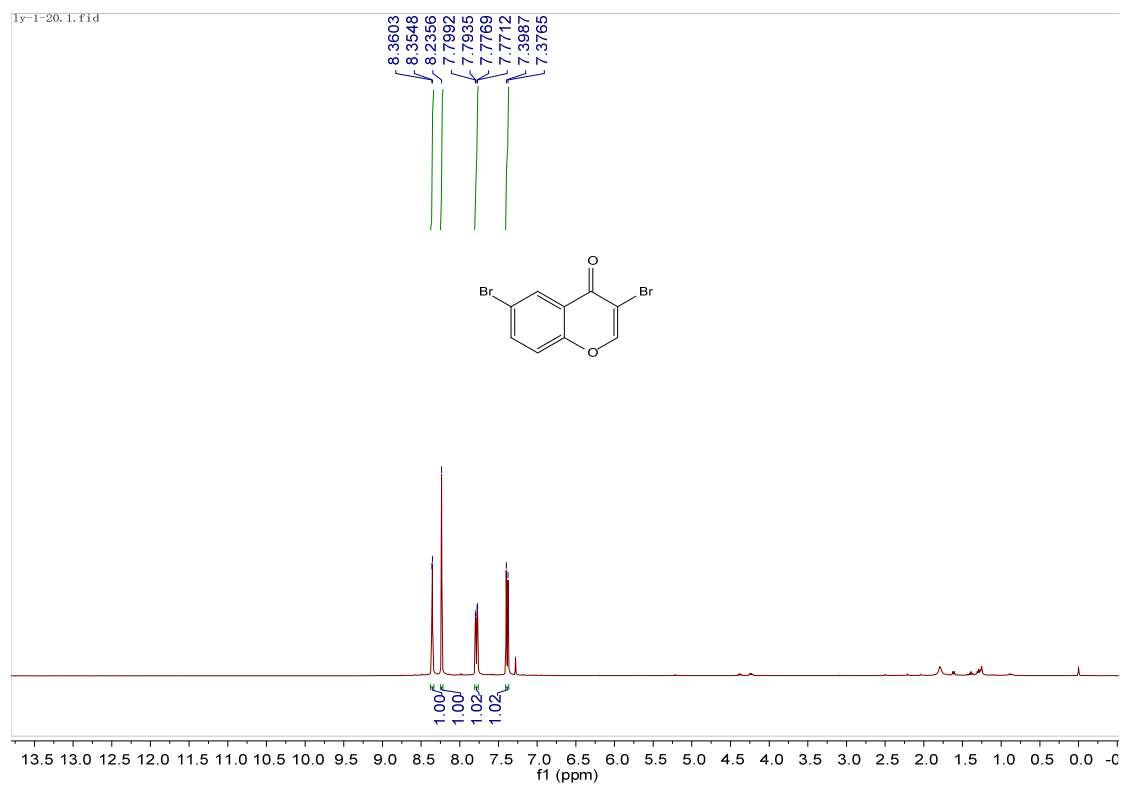

**$^1\text{H}$  NMR spectrum of 2s**

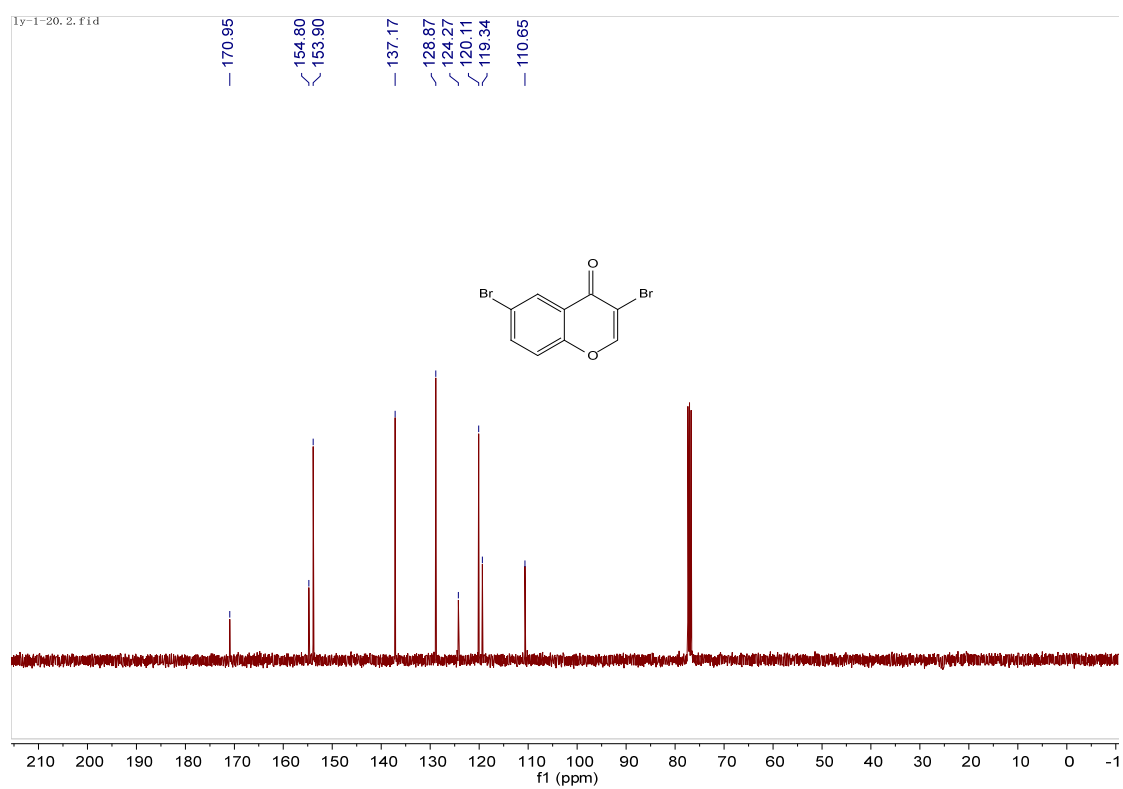

**$^{13}\text{C}$  NMR spectrum of 2s**

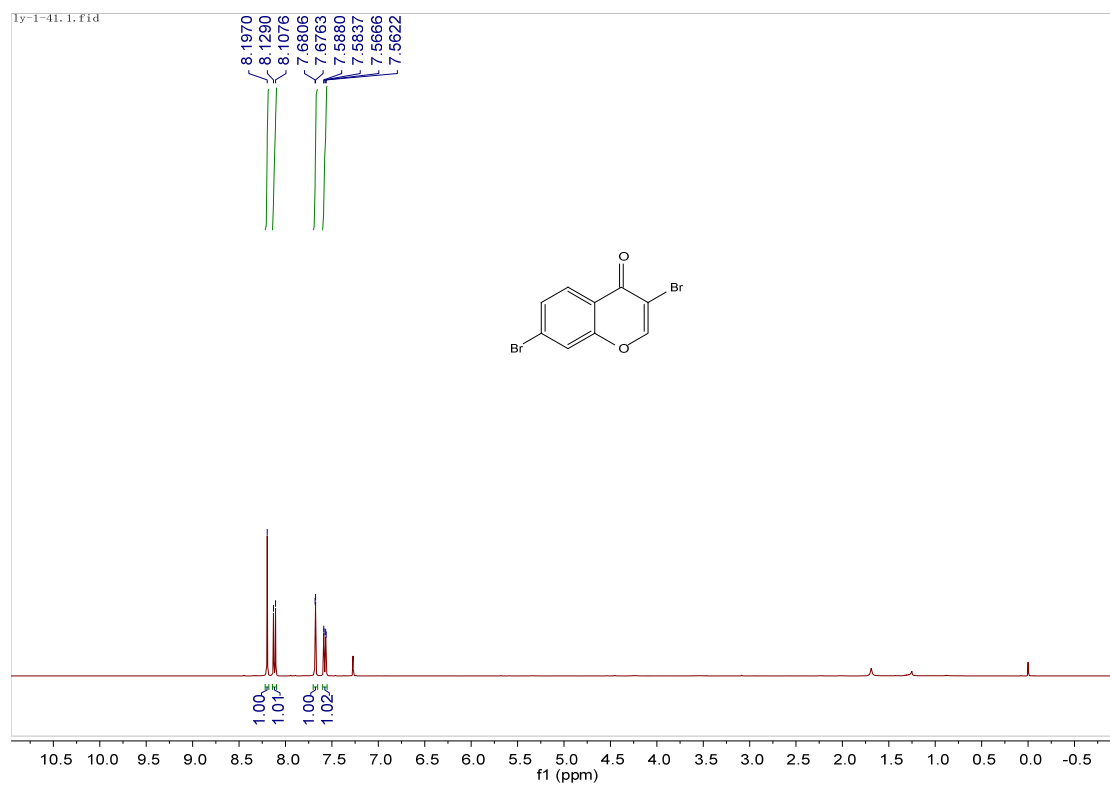

**$^1\text{H}$  NMR spectrum of 2t**

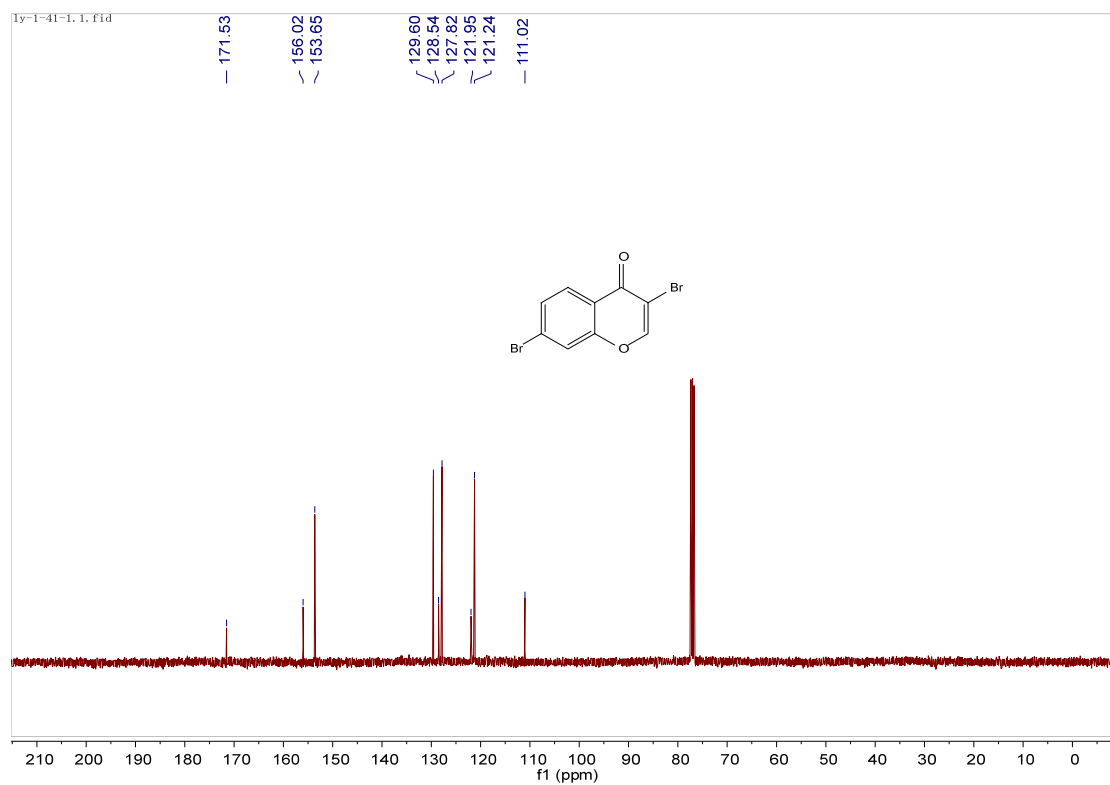

**$^{13}\text{C}$  NMR spectrum of 2t**

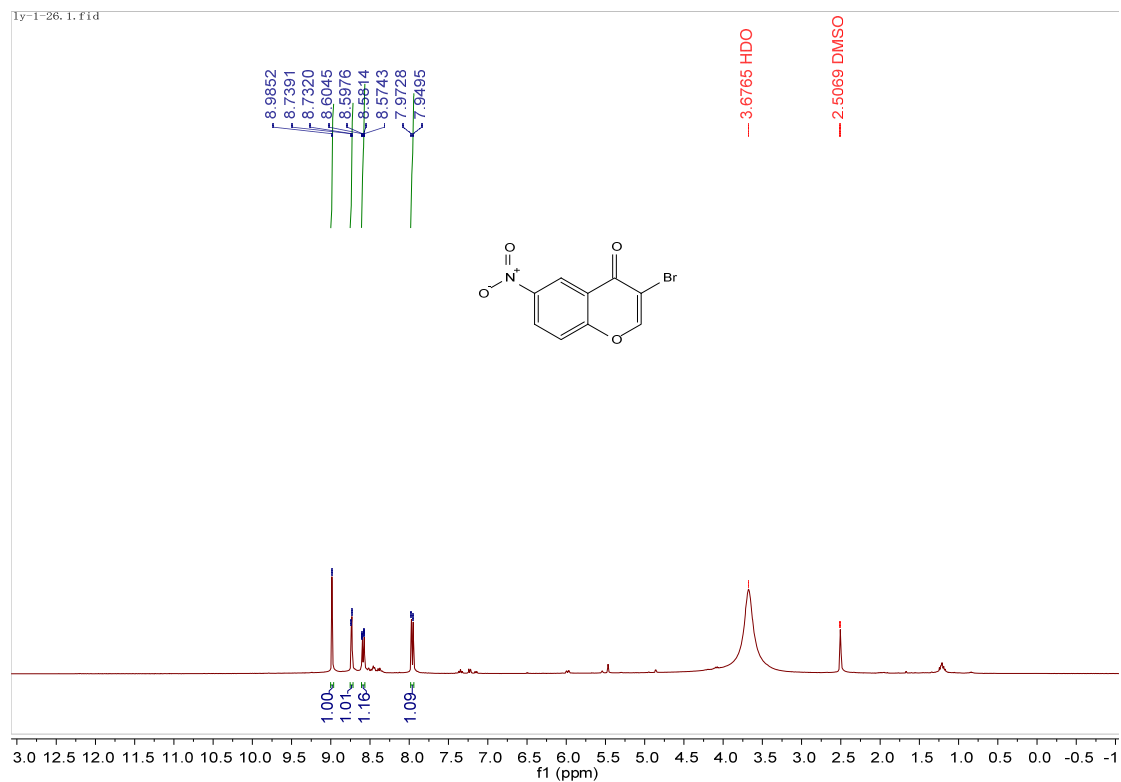

**<sup>1</sup>H NMR spectrum of 2u**

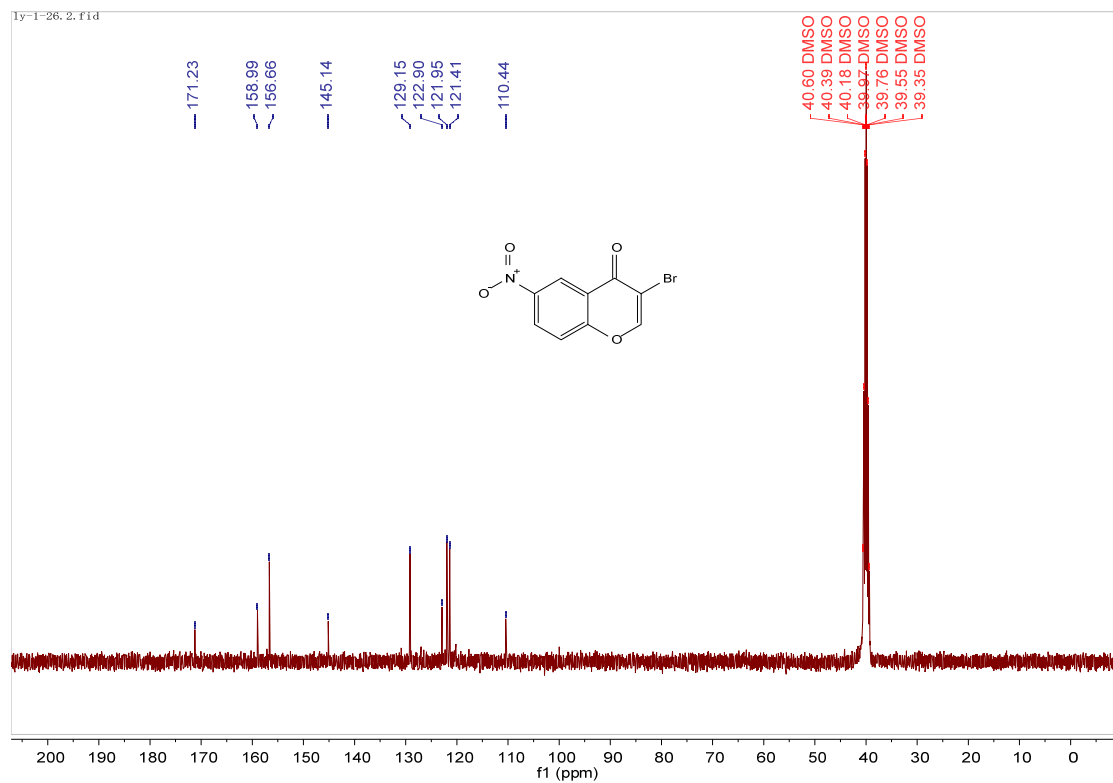

**<sup>13</sup>C NMR spectrum of 2u**
